# 1 When sinks become sources: adaptive colonization in 2 asexuals.

3 F Lavigne<sup>a,b,c</sup>, G Martin<sup>c,\*</sup>, Y Anciaux<sup>c,d</sup>, J Papaïx<sup>a</sup> and L Roques<sup>a,\*</sup>

<sup>a</sup> BioSP, INRA, 84914, Avignon, France

<sup>b</sup> Aix Marseille Univ, CNRS, Centrale Marseille, I2M, Marseille, France

<sup>c</sup> ISEM (UMR 5554), CNRS, 34095, Montpellier, France

<sup>d</sup> BIRC, Aarhus University, C.F. Møllers Allé 8, DK-8000 Aarhus C, Denmark

\*Corresponding authors: [guillaume.martin@umontpellier.fr](mailto:guillaume.martin@umontpellier.fr) and [lionel.roques@inra.fr](mailto:lionel.roques@inra.fr)

## 4 **Abstract**

5 The successful establishment of a population into a new empty habitat outside  
6 of its initial niche is a phenomenon akin to evolutionary rescue in the presence of  
7 immigration. It underlies a wide range of processes, such as biological invasions  
8 by alien organisms, host shifts in pathogens or the emergence of resistance to  
9 pesticides or antibiotics from untreated areas.

10 In this study, we derive an analytically tractable framework to describe the  
11 coupled evolutionary and demographic dynamics of asexual populations in a  
12 source-sink system. In particular, we analyze the influence of several factors  
13 — immigration rate, mutational parameters, and harshness of the stress induced  
14 by [the change of environment](#) — on the establishment success in the sink ([i.e.](#)  
15 [the formation of a self-sufficient population in the sink](#)), and on the time until  
16 establishment. To this aim, we use a classic phenotype-fitness landscape (Fisher's  
17 geometrical model in  $n$  dimensions) where source and sink habitats determine dis-  
18 tinct phenotypic optima. The harshness of stress, in the sink, is determined by  
19 the distance between [the fitness optimum in the sink and that of the source](#). The  
20 dynamics of the full distribution of fitness and of population size in the sink are  
21 analytically predicted under a strong mutation strong immigration limit where  
22 the population is always polymorphic.

23           The resulting eco-evolutionary dynamics depend on mutation and immigra-  
24           tion rates in a non straightforward way. [Below some mutation rate threshold,](#)  
25           [establishment always occurs in the sink, following a typical four-phases](#) trajec-  
26           tory of the mean fitness. The waiting time to this establishment is independent of  
27           the immigration rate and decreases with the mutation rate. Beyond the mutation  
28           rate threshold, lethal mutagenesis impedes establishment and the sink population  
29           remains so, albeit with an equilibrium state that depends on the details of the  
30           fitness landscape. We use these results to get some insight into possible effects of  
31           several management strategies.

## 32   1   Introduction

33   Most natural populations are spread over a heterogeneous set of environments, to which  
34   local subpopulations may be more or less adapted. When these local populations ex-  
35   change migrants we can define “source” and “sink” populations. Source populations,  
36   where the local genotypes have positive growth rate, are self-sustained and can send  
37   migrants to the rest of the system. They may be connected to sink populations, where  
38   local genotypes are so maladapted that they have negative growth rates (Pulliam, 1988).  
39   A recent review (Furrer and Pasinelli, 2016) showed that empirical examples of sources  
40   and sinks exist throughout the whole animal kingdom. In the absence of any plastic  
41   or evolutionary change, source-sink systems are stable, with the sources being close to  
42   their carrying capacity and the sinks being only maintained by incoming maladapted  
43   migrants from source environments. [In the literature, different source-sink systems have](#)  
44   [been categorized by their pattern of immigration and emigration](#) (for more detail on  
45   [these different categories see Fig. 1 in Sokurenko et al. \(2006\) and Table 1 in Loreau](#)  
46   [et al. \(2013\)](#)). One particular system, defined as “black-hole sink” (Gomulkiewicz et al.,  
47   1999), [corresponds to a demographic dead-end, from which emigration is negligible.](#)  
48   These black-hole sinks, and their demographic and evolutionary dynamics, are the  
49   canonical model for studying the invasion of a new environment, outside of the initial  
50   species “niche”, [and thus initially almost empty](#) (Holt et al., 2003, 2004). In this arti-  
51   cle, we will only consider black-hole sinks: for compactness, we hereafter simply use the  
52   term ‘sink’, when in fact referring to a black-hole sink population. [The demographic](#)  
53   [and evolutionary process leading, or not, to the invasion of a sink](#) is akin to evolu-  
54   tionary rescue in the presence of immigration. It underlies a wide range of biological  
55   processes: invasion of new habitats by alien organisms (Colautti et al., 2017), host shifts  
56   in pathogens or the emergence of resistance to pesticides or antibiotics, within treated

57 areas or patients (discussed e.g. in Jansen et al. (2011) and Sokurenko et al. (2006)).  
58 The issues under study in these situations are the likelihood and timescale of successful  
59 invasions (or establishment) of sinks from neighboring source populations. “Establish-  
60 ment” in a sink is generally considered successful when the population is self-sustaining  
61 in this new environment, even if immigration was to stop (e.g., Blackburn et al., 2011,  
62 for a definition of this concept in the framework of biological invasions).

63 A rich theoretical literature has considered the effects of demography and/or evolu-  
64 tion in populations facing a heterogeneous environment connected by migration, both  
65 in sexuals (e.g., Kirkpatrick and Barton, 1997) and asexuals (e.g., Débarre et al., 2013).  
66 The source-sink model is a sub-case of this general problem, that has received partic-  
67 ular attention (for a review, see Holt et al., 2005): below, we quickly summarize the  
68 relevance and key properties of source-sink models. The asymmetric migration (from  
69 source to sink alone), characteristic of black-hole sinks, provides a key simplification,  
70 while remaining fairly realistic over the early phase of invasion, where success or failure  
71 is decided. For the same reason, some models further ignore density-dependent effects  
72 in the sink, although both high (logistic growth) and/or low (Allee effect) densities  
73 could further impact the results, when relevant (discussed in Holt, 2009).

74 Some source-sink models (e.g., Drury et al., 2007; Garnier et al., 2012), focus on de-  
75 tailed demographic dynamics, in the absence of any evolutionary forces. Evolutionary  
76 forces (selection, mutation, migration, drift and possibly recombination/segregation)  
77 can greatly alter the outcome. These forces may yield both local adaptation or maladapt-  
78 ation, favoring or hindering (respectively) the ultimate invasion of the sink (“adaptive  
79 colonization”, Gomulkiewicz et al., 2010), however harsh. In this context, mutation  
80 and migration are double edged swords, both increasing the local variance available  
81 for selection but generating mutation and migration loads (resp.), due to the adverse  
82 effects of deleterious mutations and maladapted migrant inflow (resp.). For a review  
83 of the ambivalent effects of mutation and migration see e.g., (Lenormand, 2002) and  
84 (Débarre et al., 2013). Disentangling the complex interplay of these forces with demo-  
85 graphic dynamics is challenging, and modelling approaches have used various ecological  
86 simplifications: e.g. no age or stage structure, constant stress, constant migration rate.

87 The associated evolutionary processes are also simplified. As for evolutionary rescue  
88 models (discussed in Alexander et al., 2014), evolutionary source-sink models may be  
89 divided into two classes, based on the presence or absence of context-dependence in the  
90 genotype-fitness map they assume (Gomulkiewicz et al., 2010). In context-independent  
91 models, fitness in the sink is additively determined by a single or a set of freely recombin-  
92 ing loci, and adaptation occurs by directional selection on fitness itself (Gomulkiewicz

93 et al., 2010; Barton and Etheridge, 2017). In context-dependent models, which arguably  
94 forms the vast majority of source-sink models, fitness is assumed to be a concave func-  
95 tion (typically quadratic or Gaussian) of an underlying phenotype, with the source  
96 and sink environments corresponding to alternative optima for this phenotype (e.g.,  
97 Holt et al., 2003, 2004). Such nonlinear phenotype-fitness maps, with environment  
98 dependent optima, generate context-dependent interactions for fitness (epistasis and  
99 genotype x environment or “G x E” interactions): the effect of a given allele depends  
100 on the genetic and environmental background in which it is found. These models repro-  
101 duce observed empirical patterns of mutation fitness effects across backgrounds (Martin  
102 et al., 2007; MacLean et al., 2010; Trindade et al., 2012), reviewed in (Tenailon, 2014).  
103 However, their analysis is more involved. Most analytical treatments have thus relied on  
104 stationarity assumptions: e.g. describing the ultimate (mutation-selection-migration)  
105 equilibrium in asexuals (Débarre et al., 2013), or assuming a constant genetic variance  
106 and Gaussian distribution for the underlying trait in sexuals (e.g., Gomulkiewicz et al.,  
107 1999; Holt et al., 2004). While numerical explorations (by individual-based simula-  
108 tions) often relax these stationarity assumptions, they are necessarily bound to study  
109 a limited set of parameter value combinations.

110 In this paper, we explore a complementary scenario: a source-sink system, out  
111 of equilibrium, in an asexual population. The focus on asexuals is intended to bet-  
112 ter capture pathogenic microorganisms or microbial evolution experiments. We ignore  
113 density-dependence by assuming that it is negligible (no Allee effects) before and dur-  
114 ing the critical early phase of the sink invasion (far below the population reaches the  
115 carrying capacity). Considering asexuals and density-independent populations implies  
116 that several complex effects of migration (both genetic and demographic) can be ig-  
117 nored. Because migrants do not hybridize/recombine with locally adapted genotypes  
118 or use up limiting resources, the maladaptive effects of migration are limited. Mi-  
119 gration meltdown and gene swamping (see Lenormand, 2002) are thus expected to be  
120 absent. This simplification allows to analytically track out-of-equilibrium dynamics, in  
121 a context-dependent model (with epistasis and G x E), without requiring stable variance  
122 or Gaussian and moment-closure approximations for the phenotypic distribution.

123 More precisely, we study the transient dynamics of a sink under constant immigra-  
124 tion from a source population at mutation-selection balance and a sink initially empty  
125 (invasion process). We use the classic quadratic phenotype-fitness map with an isotropic  
126 version of Fisher’s geometrical model (FGM) with mutation pleiotropically affecting  $n$   
127 phenotypic traits. To make analytical progress, we use a deterministic approxima-  
128 tion (as in Martin and Roques, 2016) that neglects stochastic aspects of migration,

129 mutation and genetic drift, but tracks the full distribution of fitness and phenotypes.  
130 Under a weak selection strong mutation (WSSM) regime, when mutation rates are  
131 large compared to mutation effects, we further obtain an analytically tractable coupled  
132 partial-ordinary differential equation (PDE-ODE) model describing the evolutionary  
133 and demographic dynamics in the sink. This framework allows us to derive analytic  
134 formulae for the demographic dynamics and the distribution of fitness, at all times,  
135 which we test by exact stochastic simulations. We investigate the effect of demographic  
136 and evolutionary parameters on the establishment success, on the establishment time,  
137 and on the equilibrium mean fitness in the sink. In particular, we focus on the effects of  
138 the immigration rate, the harshness of stress (distance between source and sink optima),  
139 and mutational parameters (rate, phenotypic effects and dimension  $n$ ).

## 140 2 Methods

Throughout this paper, we follow the dynamics of the fitness distribution of the individuals in the sink environment, under the joint action of mutation, selection and immigration from the source. The latter remains stable at mutation-selection balance, as migration is asymmetric in this black-hole sink. We consider an asexual population evolving in continuous time. Consistently, we focus on Malthusian fitness  $m$  (hereafter 'fitness'): the expected growth rate (over stochastic demographic events) of a given genotypic class, per arbitrary time units. Absolute Malthusian fitnesses  $r$  are therefore (expected) growth rates, and without loss of generality,  $m$  is measured relative to that of the phenotype optimal in the sink, with growth rate  $r_{\max}$ . We thus have  $m = r - r_{\max}$ , and the mean absolute fitness  $\bar{r}(t)$  and mean relative fitness  $\bar{m}(t)$ , at time  $t$ , satisfy:

$$\bar{r}(t) = r_{\max} + \bar{m}(t).$$

141 We use a *deterministic approximation* which neglects variations among replicate pop-  
142 ulations. Under this approximation,  $\bar{r}(t)$  (respectively  $\bar{m}(t)$ ), the mean absolute (resp.  
143 relative) fitness within each population can be equated to their expected values (across  
144 stochastic events). In general, the bar  $\bar{\phantom{x}}$  denotes averages taken over the sink population.  
145 The main notations are summarized in Table 1.

### 146 2.1 Demographic model and establishment time $t_0$

147 In our simple scenario without density-dependence, evolutionary and demographic dy-  
148 namics are entirely coupled by the mean absolute Malthusian fitness (mean growth

| Notation       | Description                                                                                    |
|----------------|------------------------------------------------------------------------------------------------|
| $n$            | number of pleiotropic phenotypes                                                               |
| $\mathbf{x}$   | (breeding value for) phenotype of a given genotype                                             |
| $\mathbf{x}^*$ | Optimal phenotype (source)                                                                     |
| $d$            | Immigration rate                                                                               |
| $U$            | Genomic mutation rate                                                                          |
| $\lambda$      | Mutational variance per trait                                                                  |
| $\mu$          | $\sqrt{U\lambda}$                                                                              |
| $m$            | Malthusian fitness in the sink, relative to a genotype optimal in the sink                     |
| $m_D$          | Harshness of stress (fitness distance between source and sink optima)                          |
| $r_D$          | Decay rate, in the sink, of a genotype optimal in the source $r_D = m_D - r_{\max}$            |
| $m_{source}$   | Fitness of the migrants in the source                                                          |
| $m_{migr}$     | Fitness of the migrants in the sink                                                            |
| $p_{migr}$     | Probability density of $m_{migr}$                                                              |
| $r_{\max}$     | Maximum absolute fitness (sink)                                                                |
| $r$            | Absolute Malthusian fitness: genotypic growth rate $r = r_{\max} + m$                          |
| $N(t)$         | Population size at time $t$                                                                    |
| $\bar{m}(t)$   | Mean relative fitness                                                                          |
| $\bar{r}(t)$   | Mean absolute fitness: mean growth rate of the population $\bar{r}(t) = r_{\max} + \bar{m}(t)$ |
| $t_0$          | Establishment time                                                                             |
| $C_t(z)$       | Cumulant generating function of the relative fitness distribution in the sink                  |

Table 1: **Main notations**

149 rate). We consider a sink population with mean growth rate  $\bar{r}(t)$  at time  $t$ , receiving  
150 on average  $d$  individuals per unit time by immigration. Under the deterministic ap-  
151 proximation, the population size dynamics in the sink environment are therefore given  
152 by:

$$N'(t) = \bar{r}(t) N(t) + d, \quad (1)$$

153 with  $N'(t)$  the derivative of  $N$  with respect to  $t$  at time  $t$ .

154 In the absence of adaptation,  $\bar{r}$  is constant, leading to an equilibrium population size  
155  $N = d/(-\bar{r})$  when  $\bar{r} < 0$ , as mentioned in the Introduction. When genetic adaptation  
156 is taken into account, we need further assumptions to describe the dynamics of  $\bar{r}(t)$  in  
157 the sink.

We always assume that the new environment is initially empty ( $N(0) = 0$ ) and that  
the individuals from the source are, on average, maladapted in the sink ( $\bar{r}(0) < 0$ ).  
Following a classic definition (Blackburn et al., 2011), we define the establishment time  
 $t_0$  as the first time when the growth rate of the sink becomes positive in the absence of  
immigration:

$$t_0 := \inf\{t > 0 \text{ s.t. } \bar{r}(t) > 0\}.$$

158 This means that, from time  $t_0$ , the sink population is self-sustaining in the absence  
159 of immigration and further adaptation. By definition (assuming that  $\bar{r}$  is continuous),  
160  $t_0$  satisfies  $\bar{r}(t_0) = 0$ . Depending on the behavior of  $\bar{r}(t)$ ,  $t_0$  may therefore be finite  
161 (successful establishment) or infinite (establishment failure).

## 162 2.2 Fisher's geometric model

163 We use Fisher's geometric model (FGM) to describe the relationships between geno-  
164 types, phenotypes and fitnesses in each environment. This phenotype-fitness landscape  
165 model has the advantage of yielding realistic distributions of mutation effects on fit-  
166 nesses (Trindade et al., 2012; Hietpas et al., 2013; Tenaillon, 2014) and of generating  
167 a coupling between stress levels, the distribution of fitnesses among migrants from the  
168 source and that among *de novo* random mutants arising in the sink (Anciaux et al.,  
169 2018).

170

171 *Phenotype-fitness relationships in the two environments.* The FGM assumes that  
172 each genotype is characterized by a given breeding value for phenotype at  $n$  traits  
173 (hereafter simply denoted 'phenotype'), namely a vector  $\mathbf{x} \in \mathbb{R}^n$ . Each environment (the  
174 source and the sink) is characterized by a distinct phenotypic optimum. The distance  
175 between these optima determines the stress induced by a change of the environment.



176 An optimal phenotype in the sink has maximal absolute fitness  $r_{\max}$  (relative fitness  
177  $m = 0$ ) and sets the origin of phenotype space ( $\mathbf{x} = 0$ ). Fitness decreases away from this  
178 optimum. Following the classic version of the FGM, Malthusian fitness is a quadratic  
179 function of the breeding value  $r(\mathbf{x}) = r_{\max} - \|\mathbf{x}\|^2/2$  and  $m(\mathbf{x}) = -\|\mathbf{x}\|^2/2$ .

180 In the source, due to a different phenotype optimum  $\mathbf{x}^* \in \mathbb{R}^n$ , the relative fitness is  
181  $m^*(\mathbf{x}) = -\|\mathbf{x} - \mathbf{x}^*\|^2/2$ . As the population size is kept constant in the source (see below),  
182 only relative fitness matters in this environment. The harshness of stress  $m_D > 0$  is the  
183 fitness distance between source and sink optima:

$$m_D = -m(\mathbf{x}^*) = \|\mathbf{x}^*\|^2/2. \quad (2)$$

184 The decay rate, in the sink, of a population composed of individuals with the optimal  
185 phenotype from the source, is thus  $r_D = m_D - r_{\max}$ .

186

187 *Mutations.* In the two environments, mutations occur at rate  $U$  and create indepen-  
188 dent and identically distributed (iid) random variations  $d\mathbf{z}$  around the phenotype of  
189 the parent, for each trait. We assume here a standard Gaussian distribution of the mu-  
190 tation phenotypic effects (Kimura, 1965; Lande, 1980):  $d\mathbf{z} \sim \mathcal{N}(0, \lambda I_n)$ , where  $\lambda$  is the  
191 mutational variance at each trait, and  $I_n$  is the identity matrix in  $n$  dimensions. These  
192 assumptions induce a distribution of the mutation effects on fitness, given the relative  
193 fitness  $m_p \leq 0$  of the parent. This distribution has stochastic representation (Mar-  
194 tin, 2014)  $s \sim -m_p - \frac{\lambda}{2} \chi_n^2(-2m_p/\lambda)$ , where  $\chi_n^2(-2m_p/\lambda)$  denotes the noncentral  
195 chi-square distribution with  $n$  degrees of freedom and noncentrality  $-2m_p/\lambda$ . This dis-  
196 tribution is detailed elsewhere (reviewed in Tenailon, 2014), its mean is  $\mathbb{E}[s] = -n\lambda/2$ .  
197 Alternatively, it can be characterized by its moment generating function:

$$\mathbb{E}[e^{sz}|m_p] = M_*(z) e^{\omega(z)m_p}, \quad (3)$$

198 with

$$M_*(z) = \frac{1}{(1 + \lambda z)^{n/2}} \text{ and } \omega(z) = \frac{-\lambda z^2}{1 + \lambda z}. \quad (4)$$

199

200 *Migration events.* Migration sends randomly sampled individuals from the source  
201 into the sink, at rate  $d > 0$  per unit time. Their relative fitness in the sink is  $m_{migr}(\mathbf{x}) =$   
202  $-\|\mathbf{x}\|^2/2$ , with  $\mathbf{x}$  randomly sampled from the source's standing phenotype distribution.

## 203 2.3 Fitness distribution of the migrants

204 We assume that the distribution of phenotypes in the source is at mutation-selection bal-  
205 ance. The resulting equilibrium distribution of phenotypes yields an equilibrium fitness



206 distribution in the source. Under a weak selection strong mutation (WSSM) regime, a  
 207 simple expression for this equilibrium fitness distribution is (Martin and Roques, 2016,  
 208 equation (10)):  $m_{source} \sim -\Gamma(n/2, \mu)$ , with  $\mu := \sqrt{U\lambda}$ , where  $\Gamma(a, b)$  denotes a gamma  
 209 deviate with shape  $a$  and scale  $b$ . This WSSM regime can be quantitatively defined by  
 210 the inequality  $U > U_c := n^2 \lambda/4$  (Martin and Roques, 2016, Appendix E).

211 To understand the dynamics of the fitness distribution in the sink, we need to  
 212 compute the distribution of the relative fitness of the migrants  $m_{migr}$  when they arrive  
 213 into the sink. In our case, a handy way to describe this distribution is to compute  
 214 its moment generating function:  $e^{\phi(z)} := \mathbb{E}[e^{m_{migr} z}]$ , for any  $z \geq 0$ . Computations in  
 215 Appendix A show that for any  $z \geq 0$ :

$$\phi(z) = -\frac{n}{2} \ln(1 + \mu z) - m_D z + \frac{m_D \mu z^2}{1 + \mu z}. \quad (5)$$

216 The corresponding distribution of  $m_{migr}$  (see Appendix A) is:

$$p_{migr}(m) = \begin{cases} \frac{1}{\mu} \left(\frac{|m|}{m_D}\right)^{\frac{1}{2}(\frac{n}{2}-1)} e^{\frac{m-m_D}{\mu}} I_{\frac{n}{2}-1} \left[\frac{2\sqrt{m_D|m|}}{\mu}\right], & \text{if } m < 0 \\ 0, & \text{if } m \geq 0 \end{cases}, \quad (6)$$

217 where  $I_\nu$  is the modified Bessel function of the first kind. The accuracy of this formula  
 218 is illustrated in Fig. 1. We observe that the mean absolute fitness of the migrants,  
 219 which coincides with  $\bar{r}(0) = \lim_{t \rightarrow 0} \bar{r}(t)$ , is given by

$$\bar{r}(0) = r_{\max} + \phi'(0) = r_{\max} - m_D - \mu n/2 = -r_D - \mu n/2, \quad (7)$$

220 with  $\phi$  defined by (5). This initial growth rate is negative and corresponds to the  
 221 decay rate ( $r_D$ ) of the mean phenotype from the source (which is optimal there) plus a  
 222 variance load ( $\mu n/2$ ) due to the equilibrium variation around this mean.

223 The assumption that the individuals from the source are initially decaying ( $\bar{r}(0) < 0$ )  
 224 can therefore be expressed by the inequality  $r_{\max} - \mu n/2 < m_D$ .

## 225 2.4 Trajectories of fitness in the sink: a PDE approach

226 Assume that at time  $t$ , the population in the sink consists of the phenotypes  $\{\mathbf{x}_i(t)\}_{i=1, \dots, N(t)}$   
 227 (with  $N(t) \in \mathbb{N}$ ), with the corresponding values of relative fitnesses  $\{m_i(t)\}_{i=1, \dots, N(t)}$ . In  
 228 the absence of demography and immigration, the dynamics of the fitness distribution  
 229 is traditionally investigated by a moment closure approximation (Burger, 1991; Gerrish  
 230 and Sniegowski, 2012): the variations of the moment of order  $k$  depend on the moments

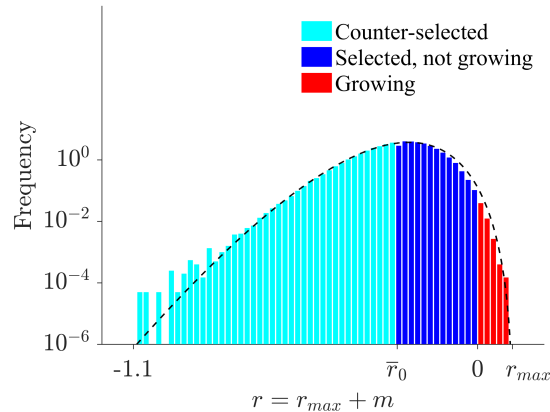

Figure 1: **Distribution of absolute fitness of the migrants in the sink.** The dashed line corresponds to the theoretical expected values of this distribution  $p_{migr}(\cdot - r_{\max})$  given by formula (6). The histogram corresponds to the distribution of migrants obtained in exact stochastic simulations after reaching the mutation-selection balance in the source (see Section 2.5). When the sink is empty, individuals are 'counter-selected' if their fitness is below the mean fitness  $\bar{r}(0)$  given by (7), 'selected' if their fitness is above  $\bar{r}(0)$ , and 'growing' if their fitness is positive. The parameter values are  $r_{\max} = 0.1$ ,  $U = 0.1$ ,  $m_D = 0.3$ ,  $\lambda = 1/300$ ,  $n = 6$  and  $N = 10^6$ .

231 of order larger than  $(k + 1)$  through a linear ordinary differential equation, and the re-  
 232 sulting system is solved by assuming that the moments vanish for  $k$  larger than some  
 233 value. A way around this issue is the use of cumulant generating functions (CGFs),  
 234 which handle all moments in a single function. In a relatively wide class of evolution-  
 235 ary models of mutation and selection, the CGF of the fitness distribution satisfies a  
 236 partial differential equation (PDE) that can be solved without requiring a moment clo-  
 237 sure approximation (Martin and Roques, 2016, Appendix B). We follow this approach  
 238 here. The empirical CGF of the relative fitness in a population of  $N(t)$  individuals with  
 239 fitnesses  $m_1(t), \dots, m_{N(t)}(t)$  is defined by

$$C_t(z) = \ln \left( \frac{1}{N(t)} \sum_{i=1}^{N(t)} e^{m_i(t)z} \right), \quad (8)$$

240 for all  $z \geq 0$ . The mean fitness and the variance in fitness in the sink can readily be  
 241 derived from derivatives, with respect to  $z$ , of the CGF, taken at  $z = 0$ :  $\bar{m}(t) = \partial_z C_t(0)$   
 242 (and  $\bar{r}(t) = r_{\max} + \partial_z C_t(0)$ ), and  $V(t) = \partial_{zz} C_t(0)$  (the variance in fitness). In the  
 243 absence of demography and immigration, and under a weak selection strong muta-  
 244 tion (WSSM) regime, (Martin and Roques, 2016, Appendix A) derived a deterministic

245 nonlocal PDE for the dynamics of  $C_t$ . We extend this approach to take into account  
 246 immigration effects and varying population sizes. This leads to the following PDE  
 247 (derived in Appendix B):

$$\partial_t C_t(z) = \underbrace{\partial_z C_t(z) - \partial_z C_t(0)}_{\text{selection}} - \underbrace{\mu^2 \left( z^2 \partial_z C_t(z) + \frac{n}{2} z \right)}_{\text{mutation}} + \underbrace{\frac{d}{N(t)} \left( e^{\phi(z) - C_t(z)} - 1 \right)}_{\text{migration, demography}}, \quad z \geq 0, \quad (9)$$

248 where we recall that  $\mu := \sqrt{U\lambda}$ . The immigration term depends on  $\phi(z)$ , which is given  
 249 by (5), and on  $N(t)$ , which satisfies the ODE (1), i.e.  $N'(t) = (\partial_z C_t(0) + r_{\max}) N(t) + d$ .  
 250 This leads to a well-posed coupled system (1) & (9) which can be solved explicitly, as  
 251 shown in Appendix C.

252 The selection term in eq. (9) stems from the increase in frequency of each lineage  
 253 proportionally to its Malthusian fitness (frequency-independent selection). The second  
 254 term is the WSSM approximation ( $U > U_c$ ) to a more complex term (Martin and  
 255 Roques, 2016, Appendix A) describing the effect of mutation: it depends on the current  
 256 background distribution (on  $C_t(z)$ ) because of the fitness epistasis inherent in the FGM.  
 257 The last term describes the effect of the inflow of migrants on lineage frequencies. It  
 258 tends to equate  $C_t(z)$  with  $\phi(z)$ , the CGF of fitnesses among migrants, proportionally  
 259 to  $d/N(t)$ , the dilution factor of migrants into the current sink population.

## 260 2.5 Individual-based stochastic simulations

261 To check the validity of our approach, we used as a benchmark an individual-based,  
 262 discrete time model of genetic drift, selection, mutation, reproduction and migration  
 263 with non-overlapping generations.

264 *Source population.* A standard Wright-Fisher model with constant population size was  
 265 used to compute the equilibrium distribution of phenotypes in the source. Our compu-  
 266 tations were carried out with  $N^* = 10^6$  individuals in the source. Each individual  $i =$   
 267  $1, \dots, N^*$  has phenotype  $\mathbf{x}_i \in \mathbb{R}^n$  and relative Malthusian fitness  $m_i = -\|\mathbf{x}_i - \mathbf{x}^*\|^2/2$ ,  
 268 with corresponding Darwinian fitness  $e^{m_i}$  (discrete time counterpart of the Malthusian  
 269 fitness). At each generation,  $N^*$  individuals are sampled with replacement proportion-  
 270 ally to their Darwinian fitness. Mutations are simulated by randomly drawing, every  
 271 generation and for each individual, a Poisson number of mutations, with rate  $U$ . Mu-  
 272 tation acts additively on phenotype, with individual effects  $d\mathbf{x}$  drawn into an isotropic

273 multivariate Gaussian distribution with variance  $\lambda$  per trait (see Section 2.2). Simu-  
274 lations were started with a homogeneous population ( $\mathbf{x}_i = \mathbf{x}^*$  for all  $i$  at initial time)  
275 and ran for  $20/\sqrt{\mu}$  generations (the predicted time taken to reach a proportion  $q$  of the  
276 final equilibrium mean fitness is  $\text{atanh}(q)/\sqrt{\mu}$ , see Appendix E, Section “Characteris-  
277 tic time” in Martin and Roques (2016); with  $\text{atanh}(q) = 20$ , one can consider that the  
278 equilibrium has been reached). An example of the distribution of absolute fitness in the  
279 resulting (equilibrium) source population, after migrating into the sink (distribution of  
280  $r_{\max} - \|\mathbf{x}_i\|^2/2$ ) is presented in Fig. 1.

281

282 *Sink population.* We started with  $N(0) = 0$  individuals in the sink. Then, the process  
283 to go from generation  $t$  to generation  $(t + 1)$  is divided into three steps: (i) migration: a  
284 Poisson number of migrants, with rate  $d$ , was randomly sampled from the equilibrium  
285 source population, and added to the population in the sink; (ii) reproduction, selection  
286 and drift: each individual produced a Poisson number of offspring with rate  $\exp(r_i) =$   
287  $\exp(r_{\max} + m_i)$  (absolute Darwinian fitness in the sink); (iii) mutation followed the  
288 same process as in the source population. The stopping criterion was reached when  
289  $N(t) > 1.5 \cdot 10^6$  individuals or  $t > 5 \cdot 10^3$  to limit computation times.

290

291 All the Matlab<sup>®</sup> codes to generate individual-based simulations are provided in  
292 Supplementary File 1.

## 293 3 Results

### 294 3.1 Trajectories of mean fitness

295 **Dynamics of  $\bar{r}(t)$  and  $N(t)$ .** The system (1) & (9) leads to an expression for the  
296 mean absolute fitness (Appendix C):

$$\bar{r}(t) = \frac{f(t) - 1}{\int_0^t f(\tau) d\tau}, \text{ with } f(t) = \exp \left[ \left( r_{\max} - \mu \frac{n}{2} \right) t + \frac{m_D}{2\mu} (e^{-2\mu t} - 1) \right]. \quad (10)$$

297 It also leads to an expression for the population size thanks to  $N'(t) = \bar{r}(t) N(t) + d$ .  
298 (see eq. (16) in Appendix C).

299 The good accuracy of eq. (10) is illustrated in Figs. 2-4, by comparing it with  
300 the results of individual-based stochastic simulations, under the WSSM assumption  
301 ( $U > U_c := n^2 \lambda/4$ ). Both the individual-based simulations and the analytic expres-  
302 sions show that sink invasion tends to follow four different phases, which are all the

303 more pronounced as the harshness of stress  $m_D$  increases. *Phase 1*: During the first  
304 generations, the mean fitness slightly increases; *Phase 2*: The mean fitness remains  
305 stable. *Phase 3*: Rapid increase in mean fitness. *Phase 4*: The mean fitness stabilizes  
306 at some asymptotic value. In the case of establishment failure (Fig. 4), the adaptation  
307 process remains in Phase 2.

308 In all cases, formula (7) gives an accurate prediction of the mean fitness of the  
309 migrants, as shown by the agreement between theoretical and simulated values of  $\bar{r}(0)$ .  
310 Other trajectories, outside of the WSSM regime ( $U < U_c$ ) are presented in Appendix D  
311 (and discussed in Section 3.3).

312 **Phenotypic dynamics over the different phases of invasion.** Obviously the  
313 dichotomy into four phases could be deemed somewhat arbitrary, and it is clearly less  
314 marked with milder stress (top panels of Fig. 2). However, it does convey the qualitative  
315 chronology of the whole process in all cases. This can be further understood by exploring  
316 the dynamics of the phenotypic distribution over time: a typical example for a single  
317 simulation is given in Fig. 3, at four times corresponding to each of the four phases.  
318 We show here the phenotypic distribution along the one meaningful dimension, that for  
319 which the optimum is shifted between source and sink (the optimum in the sink is 0,  
320 and the optimum in the source  $\mathbf{x}^* = (\sqrt{2m_D}, 0, \dots, 0)$ ). The corresponding trajectories  
321 of fitness and population size are available in Appendix E (Fig. 9). A video file of the  
322 phenotype distribution is also available as Supplementary File 2.

323 During Phases 1 and 2, the phenotypic distribution is fairly stable and slightly  
324 shifted from the source distribution towards the sink optimum. The short Phase 1  
325 merely witnesses an increase in population size from zero to the semi-stable Phase 2.  
326 We suggest that this semi-stable state approximately corresponds to a macroscopic  
327 “equilibrium” between migration and selection on the bulk of phenotypes. Here, we  
328 conjecture a negligible impact of mutation on this bulk because simulations in the  
329 absence of mutation in the sink yield a very similar phenotypic distribution during  
330 Phase 2 (Appendix J, Fig. 12). However, over the course of Phase 2, a second mode  
331 slowly appears closer to the sink optimum, due to the invasion of rare, better adapted,  
332 phenotypes (generated by the combined effects of rare adapted migrants and *de novo*  
333 mutation in the sink). When this second mode becomes significant in frequency, Phase  
334 3 starts with a rapid increase of the second mode (and of mean fitness), because phe-  
335 notypic and fitness variance are then maximized. The last Phase 4 corresponds to the  
336 new equilibrium dominated by a mutation selection balance around the sink optimum.  
337 In the present model without density limitations, migration becomes ultimately negligi-

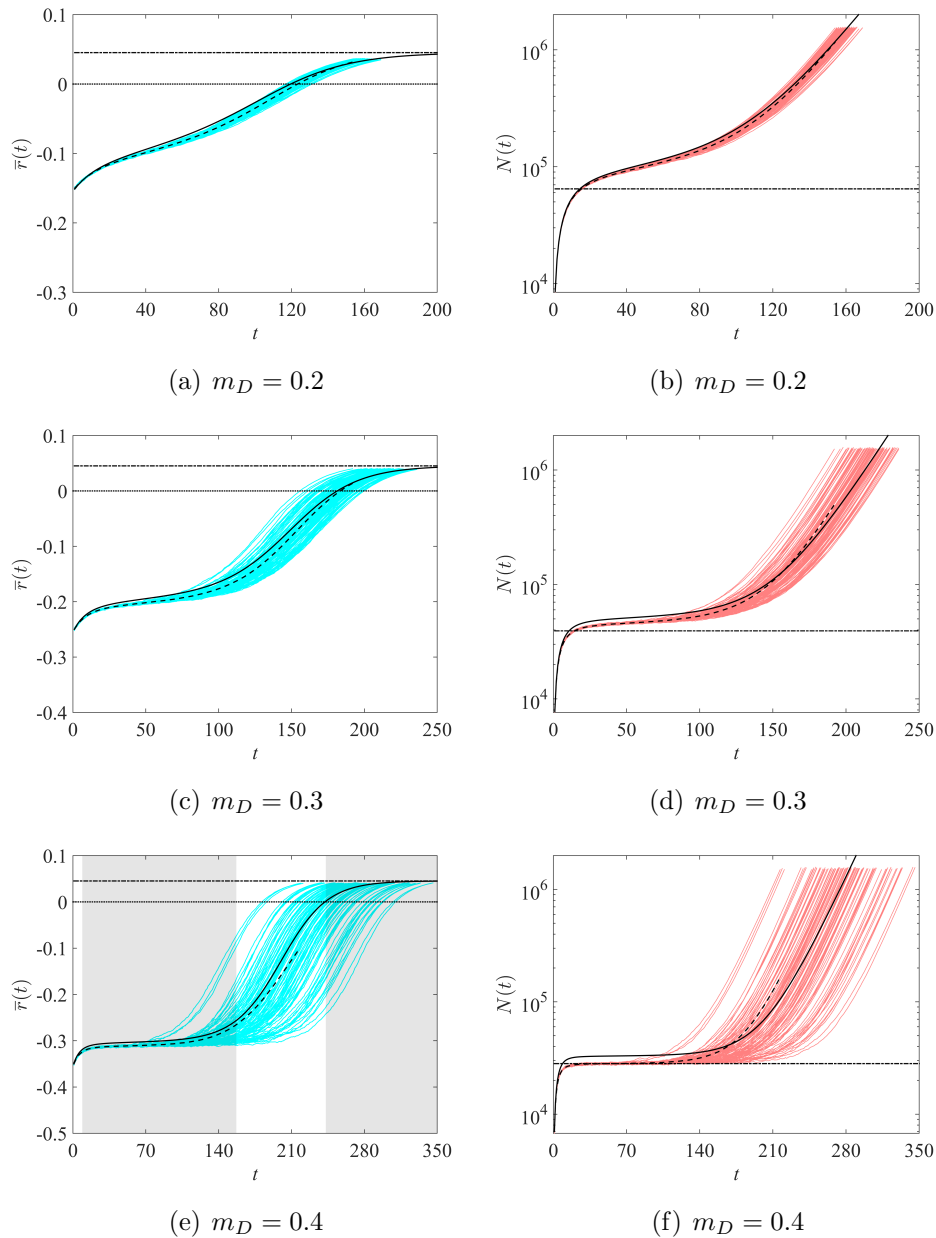

**Figure 2: Trajectories of mean fitnesses and population sizes in a WSSM regime, depending on the harshness of stress.** Solid lines: analytical predictions given by formulae (1) and (10) vs 100 trajectories obtained by individual-based simulations (blue curves for  $\bar{r}(t)$  and red curves for  $N(t)$ ; dashed lines: mean values averaged over the 100 populations). Horizontal dashed-dotted lines: theoretical value of  $\bar{r}(\infty) = r_{\max} - \mu n/2$  (left panels) and equilibrium population size  $-d/\bar{r}(0)$  in the absence of adaptation (right panels). The four phases of invasion (Phases 1-4, see main text) are illustrated by distinct shaded areas on panel (e). The parameter values are  $U = 0.1$  (thus,  $U > U_c = 0.03$ , which is consistent with the WSSM regime),  $r_{\max} = 0.1$ ,  $\lambda = 1/300$ ,  $n = 6$  and  $d = 10^4$ . Due to the stopping criterion  $N(t) = 1.5 \cdot 10^6$  was reached, the mean values could not be computed over the full time span.

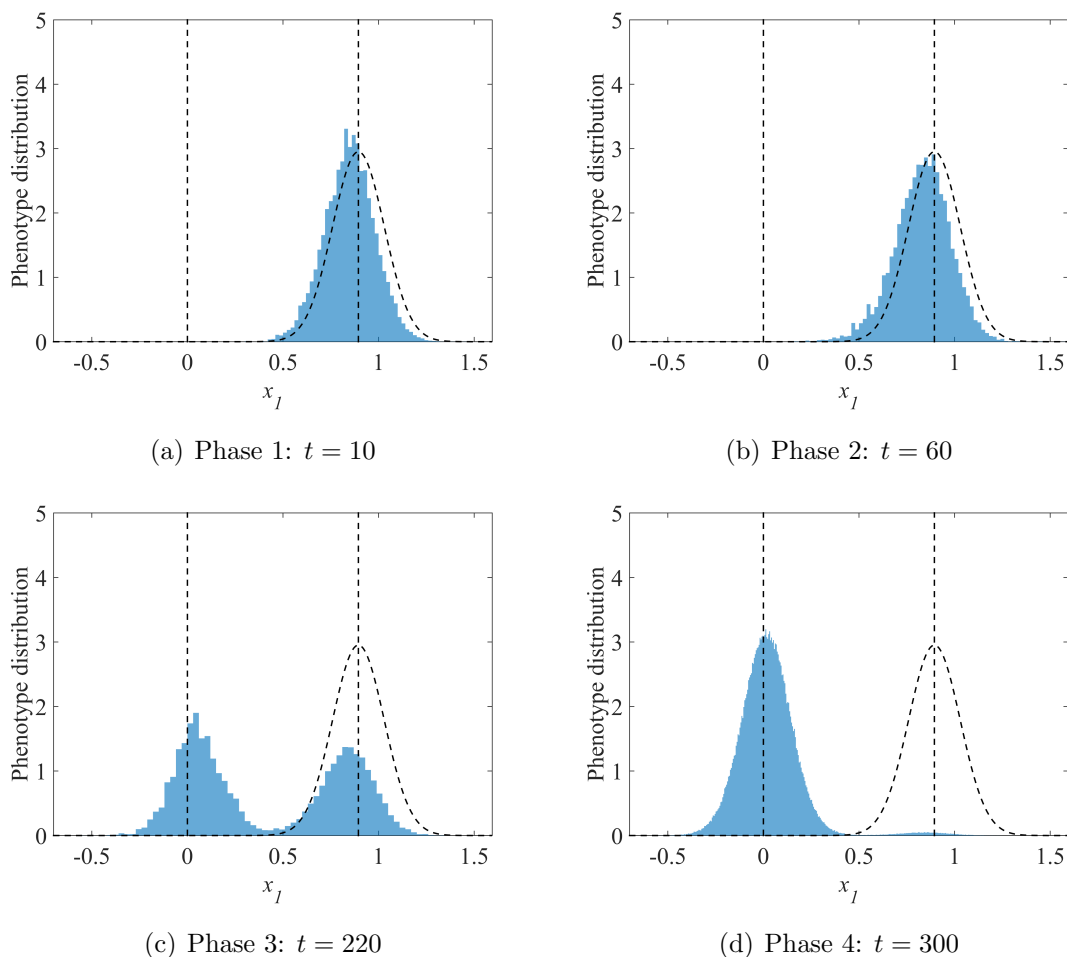

Figure 3: **Phenotype distribution in the sink, along the direction  $x_1$ .** The vertical dotted lines correspond to the sink ( $x_1 = 0$ ) and source ( $x_1 = \sqrt{2m_D}$ ) optima. The black dotted curve corresponds to the theoretical distribution of migrant's phenotypes in the sink (Gaussian distribution, centered at  $x_1 = \sqrt{2m_D}$ , and with variance  $\mu = \sqrt{U\lambda}$ ). In all cases, the parameter values are  $m_D = 0.4$ ,  $U = 0.1$ ,  $r_{\max} = 0.1$ ,  $\lambda = 1/300$ ,  $n = 6$  and  $d = 10^4$ .

338 ble as the sink population explodes, and its phenotypic distribution ultimately reaches  
 339 exactly a new mutation-selection balance.

340 **Effect of the immigration rate.** Unexpectedly, the value of  $\bar{r}(t)$  in formula (10)  
 341 does not depend on the immigration rate  $d$ . Thus, only the population size dynamics are  
 342 influenced by the immigration rate, but not the evolutionary dynamics. To understand  
 343 this phenomenon, we may divide the equation  $N'(t) = \bar{r}(t)N(t) + d$  by  $d$ , leading to  
 344  $P'(t) = \bar{r}(t)P(t) + 1$  with  $P(t) = N(t)/d$ . Then, we observe that the main system



345 (1) & (9) can be written in terms of  $P(t)$ , independently of  $N$  and  $d$ . This means that  
346 the ratio  $N(t)/d$  is not influenced by  $d$ . This yields the independence of the evolutionary  
347 dynamics of  $d$ , because the effect of migration on mean fitness in (9) only depends on  
348  $d/N(t)$ .

349 A simple mathematical argument (Appendix F) shows that this property will apply  
350 beyond the present model. The result arises for any model where (i) the evolutionary  
351 and demographic dynamics in the sink are density-independent (apart from the impact  
352 of migration) and (ii) the sink is initially empty (or at least  $d \gg N(0)$ ). This means that  
353 it should apply for a broad class of models of asexual evolution in black-hole sinks. Note  
354 however, that sex and recombination, for example, necessarily create density-dependent  
355 evolution as recombination with migrants affects the genotype frequencies beyond the  
356 pure demographic impact of migration.

357 An intuition for the independence of  $\bar{r}(t)$  on  $d$  might be framed as follows: if  $d$  is  
358 increased (resp. decreased), the sink fills in more (resp. less) rapidly, from  $N(0) = 0$ ,  
359 proportionally to the increase (resp. decrease) in  $d$ , at all times. Therefore things cancel  
360 out in the migration contribution on frequencies ( $d/N(t)$  is unaffected), and this con-  
361 tribution is the only one where  $d$  enters the dynamics. Overall increasing or decreasing  
362  $d$  thus has no effect on genotype frequency dynamics, although it does affect popula-  
363 tion sizes. This balanced effect likely exists qualitatively in even more general condi-  
364 tions, but the exact cancelling out only happens with exponential (density-independent)  
365 growth/decay, density independent mutation and selection, and an initially empty sink.

366 **Large time behavior.** As seen in Fig. 2,  $\bar{r}(t)$  converges towards an asymptotic value  
367  $\bar{r}(\infty)$  at large times. The expression (10) shows that this value depends on  $r_{\max}$ ,  $\mu$  and  
368  $n$ . Interestingly, it becomes dependent on the harshness of stress  $m_D$ , only in the case  
369 of establishment failure. More precisely, we get:

$$\begin{aligned} \text{if } r_{\max} - \mu n/2 \geq 0 \text{ then } \bar{r}(\infty) &= r_{\max} - \mu n/2, \text{ and } N(\infty) = \infty \\ \text{if } r_{\max} - \mu n/2 < 0 \text{ then } \bar{r}(\infty) &= r_{\max} - \mu n/2 - \delta(m_D), \text{ and } N(\infty) = -d/\bar{r}(\infty), \end{aligned} \tag{11}$$

370 for some function  $\delta(m_D)$  such that  $m_D > \delta(m_D) > m_D/8$  for  $\mu$  large enough (the  
371 inequality  $\delta(m_D) > m_D/8$  is true whatever the phenotype dimension  $n$ ). When  $n$  is  
372 large enough, sharper lower bounds can be obtained, e.g.  $\delta(m_D) > 3m_D/8$  for  $n \geq 6$ ),  
373 see Appendix G.

374 These asymptotic results can be interpreted as follows. Below some threshold ( $U <$   
375  $U_{lethal} := 4r_{\max}^2/(\lambda n^2)$ , or equivalently  $\mu < \mu_{lethal} := 2r_{\max}/n$ ), establishment is always  
376 successful and the sink population ultimately explodes (as we ignore density-dependence

377 in the sink). As  $d/N(\infty) = 0$ , the demographic and evolutionary effects of migrants  
378 thus become negligible (being diluted in an effectively infinite population). The sink  
379 population thus reaches mutation-selection balance, with a mutation load  $\mu n/2$ , as if  
380 it was isolated. It ultimately grows exponentially at rate  $r_{\max} - \mu n/2$  as illustrated in  
381 Fig. 2.

382 On the contrary, large mutation rates ( $U \geq U_{lethal}$  or equivalently  $\mu \geq \mu_{lethal}$ ) lead  
383 to establishment failure, which is a form of lethal mutagenesis (see Bull et al. (2007)  
384 for viruses and Bull and Wilke (2008) for bacteria) illustrated in Fig. 4. In this regime,  
385 the mutation load  $\mu n/2$  is larger than the absolute maximal fitness  $r_{\max}$  in the sink.  
386 Therefore, at mutation-selection balance and even in the absence of any migration,  
387 the population could never show positive growth: establishment is impossible because  
388 the fitness peak is too low, given the mutation rate and effect. We further identify a  
389 “jump” of amplitude  $\delta(m_D)$  in the equilibrium mean fitness, as  $\mu$  increases beyond the  
390 lethal mutagenesis threshold (illustrated in Fig. 5). Then, the population ultimately  
391 reaches a stable size determined by an immigration - decay equilibrium: a migration  
392 load can build up at equilibrium ( $\delta(m_D)$ ) together with the mutation load ( $\mu n/2$ ). This  
393 migration load is produced by the constant inflow of maladapted genotypes from the  
394 source and does depend on the harshness of stress  $m_D$ . It is this migration load that  
395 creates the “phase transition” in equilibrium fitness as  $\mu$  crosses beyond  $\mu_{lethal}$ , the  
396 lethal mutagenesis threshold (Fig. 5). **Note, however, that contrary to what happens**  
397 **with sexuals, migrants entering an asexual population do not interbreed with locally**  
398 **adapted genotypes, which simplifies the effect of migration.** Note also that, in this  
399 lethal mutagenesis regime, the sink population does establish to a stable size, that may  
400 be higher than that expected in the absence of mutation and adaptation. However, this  
401 is not an establishment in that the population would still get extinct if migration was  
402 to be stopped.

### 403 **3.2 Establishment time $t_0$**

404 Of critical importance is the waiting time until the sink becomes a source, when this  
405 happens, namely the time  $t_0$  at which  $\bar{r}(t)$  becomes positive. This section is devoted to  
406 the analysis of this time.

407 **Derivation of an analytical expression.** Using the expression (10), we can solve  
408 the equation  $\bar{r}(t_0) = 0$ . We recall that, due to our assumptions,  $t_0 > 0$ , i.e.  $\bar{r}(0) =$   
409  $r_{\max} - \mu n/2 - m_D < 0$ .

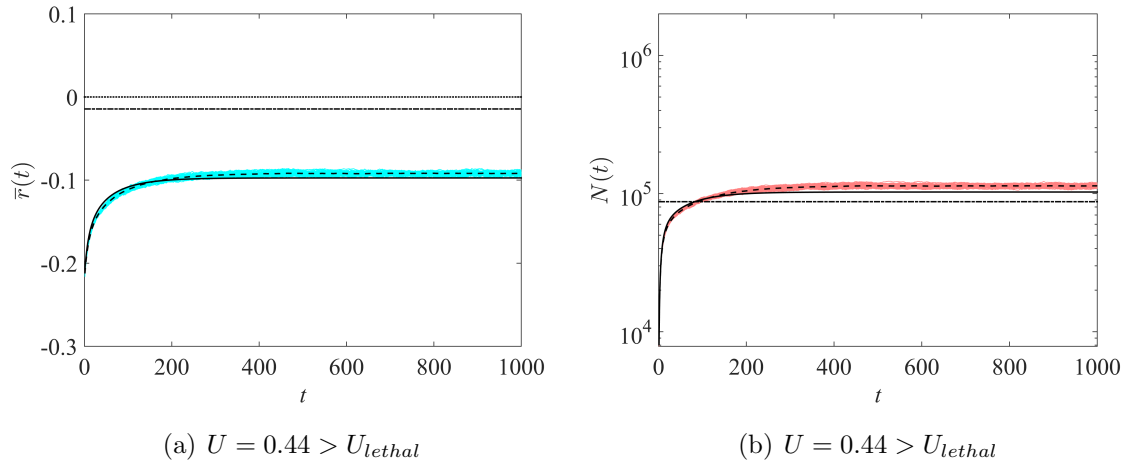

Figure 4: **Trajectories of mean fitnesses and population sizes, lethal mutagenesis regime.** Same legend as in Fig. 2. Other parameter values are  $m_D = 0.2$ ,  $r_{\max} = 0.1$ ,  $\lambda = 1/300$ ,  $n = 6$  and  $d = 10^4$ , leading to a theoretical threshold value for lethal mutagenesis  $U_{lethal} = 4r_{\max}^2/(\lambda n^2) = 0.33$ . The panel (a) illustrates the bifurcation in the behavior of the equilibrium mean fitness as  $r_{\max} - \mu n/2$  becomes negative.

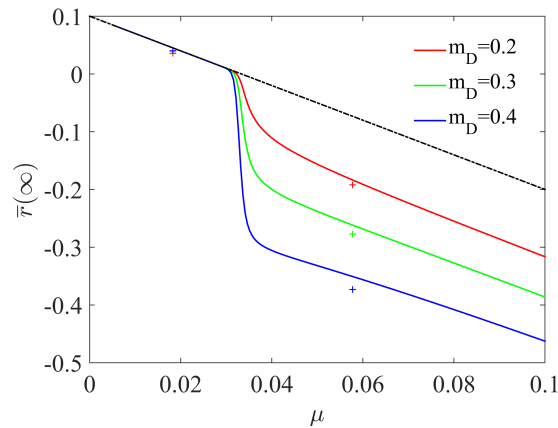

Figure 5: **Mean fitness at large times, dependence with  $\mu$  and  $m_D$ .** The solid lines are the values given by formula (11). The crosses correspond to the result of individual-based simulations. The dashed-dot line corresponds to  $r_{\max} - \mu n/2$ ; the gap between the dashed-dot line and the solid lines represents the amplitude of the jump  $\delta(m_D)$ . Parameter values:  $r_{\max} = 0.1$ ,  $n = 6$ .

410 The result in (11) shows that  $t_0 = \infty$  if  $r_{\max} - \mu n/2 \leq 0$  (establishment failure).  
411 In the case of successful establishment ( $m_D > \bar{r}(\infty) = r_{\max} - \mu n/2 > 0$ ), the waiting  
412 time to this establishment is:

$$t_0 = \frac{1}{2\mu} [c + W_0(-ce^{-c})], \quad c = \frac{m_D}{r_{\max} - \mu n/2}, \quad (12)$$

413 with  $W_0$  the principal branch of the Lambert-W function (see Appendix H).

414 First of all, eq. (12) shows that the waiting time is independent of the dispersal  
415 rate  $d$ . This was further sustained by individual-based simulations (Fig. 6a) as  $t_0$   
416 was found to drop rapidly to its predicted value as  $d$  increases (as the deterministic  
417 approximation becomes accurate), to then become independent of  $d$ . The waiting time  
418 shows a transition (around  $c = 1$ ) from  $t_0 \approx c/2\mu$  for small  $c$  to  $t_0 \approx c/\mu$  for large  $c$ ,  
419 so the establishment time always increases close to linearly with the harshness of stress  
420  $m_D$ . This was also the case in individual-based simulations (Fig. 6c), at least until  
421 stress becomes too strong, compared to mutation and migration. In that case, the sink  
422 population remains fairly small for a long time and our deterministic approximation  
423 no longer applies, at least in the early phases (1 and 2) of invasion (see Section 3.3).  
424 Eq. (12) also implies that the establishment time  $t_0$  decreases with  $r_{\max}$  and increases  
425 with  $n$ . The dependence with respect to the mutational parameter  $\mu$  is more subtle:  
426 as  $\mu$  is increased,  $t_0(\mu)$  first decreases until  $\mu$  reaches an 'optimal value' (minimizing  
427 invasion time), then  $t_0(\mu)$  increases until  $\mu$  reaches the lethal mutagenesis threshold  
428 ( $\mu_{lethal} = 2 r_{\max}/n$ ). This behaviour always holds, as proven analytically in Appendix H.  
429 This non-monotonous variation of  $t_0$  with mutation rate (here with  $\mu = \sqrt{U\lambda}$ ) was also  
430 found in individual-based simulations (Fig. 6b).

431 Most of these effects are fairly intuitive: it takes more time to establish from a  
432 more maladapted source ( $m_D$ ), with a smaller mutational variance ( $U\lambda$ ), although their  
433 particularly simple quantitative effect on  $t_0$  was somewhat unexpected. The effect of  
434  $r_{\max}$ , although quantitatively simple, has multiple aspects. Indeed,  $r_{\max}$  affects various  
435 parameters of the establishment process, all else being equal: it decreases the initial rate  
436 of decay ( $\bar{r}(0) = r_{\max} - m_D - \mu n/2$ ) and increases the proportion of migrants that are  
437 resistant to the sink environment (fitness peak height) which both speed adaptation. It  
438 also increases the ultimate exponential growth rate of the population ( $\bar{r}(\infty) = r_{\max} -$   
439  $\mu n/2$ ). The latter effect is likely irrelevant to  $t_0$ , however, as this growth phase occurs  
440 after the establishment time.

441 **Effect of an intermediate sink.** The simulations identify a sharp transition, in the  
442 harshness of stress, beyond which establishment does not occur (or occurs at very large

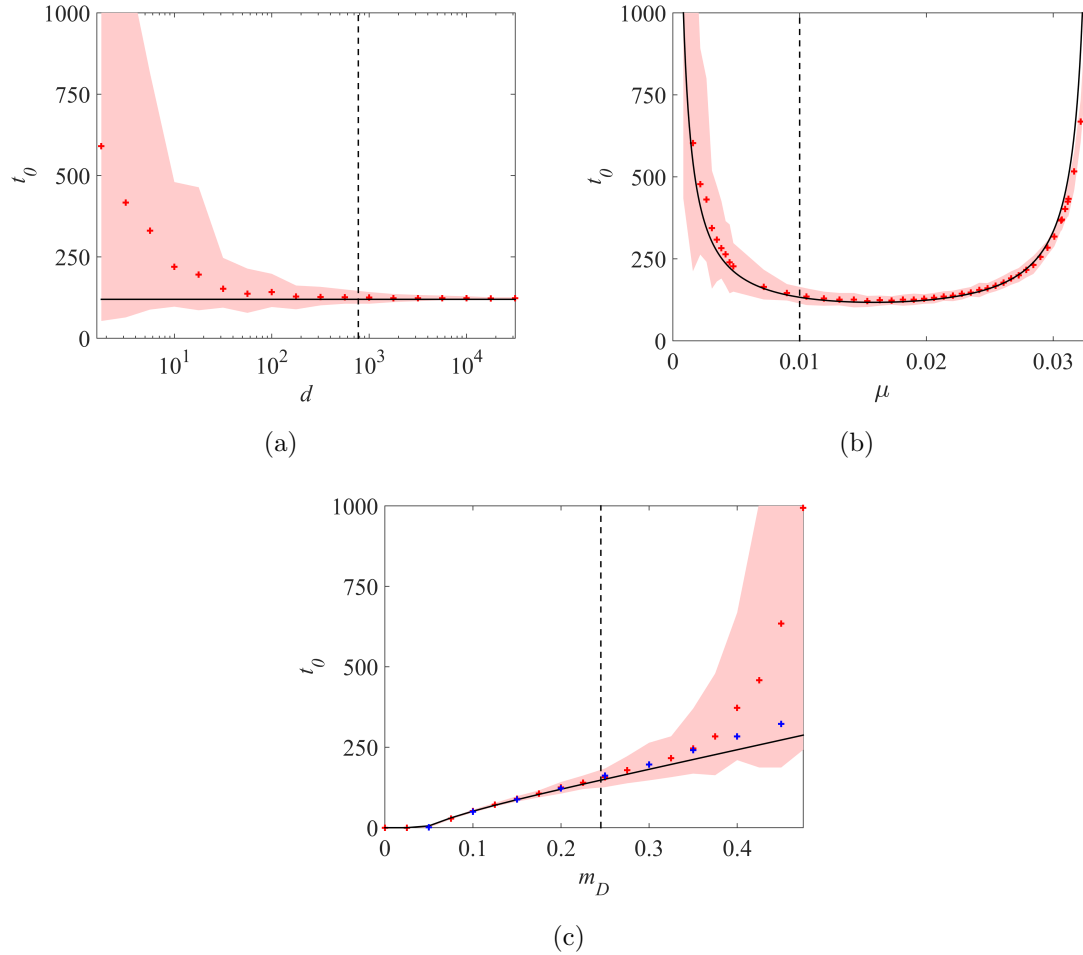

Figure 6: **Establishment time  $t_0$ , dependence with the immigration rate  $d$ , the mutational parameter  $\mu$  and the harshness of stress  $m_D$ .** Theoretical value of  $t_0$  (black curve) vs value obtained with individual-based simulations (red crosses) and 95% confidence intervals, with fixed  $m_D = 0.2$ ,  $U = 0.1$  (panel a),  $m_D = 0.2$ ,  $d = 10^3$  (panel b) and fixed  $d = 10^3$ ,  $U = 0.1$  (panel c). The vertical dotted lines correspond to the values of  $d$ ,  $\mu$  and  $m_D$  such that  $-dU/\bar{r}(0) = 500$  (panels b and c) and  $U = U_c$  (panel b). The blue crosses in panel (c) correspond to the establishment time  $t_0^I(m_D)$ , obtained by individual-based simulations, in the presence of an intermediate habitat with phenotype optimum  $\mathbf{x}^I$  such that  $\|\mathbf{x}^* - \mathbf{x}^I\|^2/2 = \|\mathbf{x}^I\|^2/2 = m_D/2$ . In all cases, the parameter values are  $r_{\max} = 0.1$ ,  $\lambda = 1/300$ ,  $n = 6$ .

443 times), see Appendix I. We see in Fig. 6 that as  $m_D$  gets close to this threshold, the  
444 dependence between  $t_0$  and  $m_D$  shifts from linear to superlinear (convex). Based on  
445 previous results on evolutionary rescue in the FGM (Anciaux et al., 2018), we conjecture  
446 that this pattern is inherent to the phenotype fitness landscape model. In the FGM,  
447 increased stress (higher  $m_D$ ) is caused by a larger shift in optimum from source to sink.  
448 This has two effects, (i) a demographic effect (faster decay of new migrants, on average)  
449 and (ii) an evolutionary effect. This latter effect is simply due to the geometry of the  
450 landscape. Indeed, when the shift in optimum from source to sink is larger, there are  
451 fewer genotypes, in the migrant pool, that can grow in the sink and they tend to grow  
452 more slowly. This effect is highly non-linear with stress, showing a sharp transition in  
453 the proportion of resistant genotypes beyond some threshold stress (for more details  
454 see Anciaux et al., 2018).

455 We argue that this type of dependence has important implications for the potential  
456 effect of an intermediate milder sink, with phenotype optimum  $\mathbf{x}^I$  in between  $\mathbf{x}^*$  (opti-  
457 mum in the source) and 0 (optimum in the sink), connected by a stepping-stone model  
458 of migration. A natural question is then whether the presence of this intermediate sink  
459 affects the waiting time to establish in the harsher sink. In that respect, assume that  
460 the overall harshness of stress (fitness distance between optima) is the same with and  
461 without the intermediate habitat  $I$ : schematically,  $m_D = m_D(\mathbf{x}^* \rightarrow 0) = m_D(\mathbf{x}^* \rightarrow$   
462  $\mathbf{x}^I) + m_D(\mathbf{x}^I \rightarrow 0)$ . When  $m_D$  is low,  $t_0$  is roughly linear with  $m_D$  so that it may take a  
463 similar time to establish in two step and in one (the sum of intermediate establishment  
464 times would be the same as that to establish in a single jump). However, for harsher  
465 stress levels where  $t_0$  is superlinear with  $m_D$ , the intermediate habitat could provide a  
466 springboard to invade the final sink, if both intermediate jumps are much faster than  
467 the leap from source to final sink.

468 To check this theory, we considered a new individual-based model with an interme-  
469 diate habitat with phenotype optimum  $\mathbf{x}^I$  such that  $\|\mathbf{x}^* - \mathbf{x}^I\|^2/2 = \|\mathbf{x}^I\|^2/2 = m_D/2$ .  
470 The dynamics between the source and the sink are the same as those described in  
471 Section 2.5. In addition, we assume that (1) the source also sends migrants to the  
472 intermediate habitat at a rate  $d$ ; (2) reproduction, selection and drift occur in the in-  
473 termediate habitat following the same rules as in the sink, until the population  $N_I(t)$   
474 in the intermediate habitat reaches the carrying capacity  $K = N^*$  (same population  
475 size as in the source); (3) the intermediate habitat sends migrants to the ultimate sink,  
476 at rate  $d N_I(t)/N^*$ . Then, we computed the time  $t_0^I(m_D)$  needed to establish in the  
477 final sink, in the presence of the intermediate habitat (value averaged over 100 replicate  
478 simulations).

479 The results presented in Fig. 6c (blue crosses) confirm that for small  $m_D$ , the pres-  
480 ence of an intermediate habitat has almost no effect ( $t_0^I(m_D) \approx t_0(m_D)$ ). However, when  
481  $m_D$  becomes larger and  $t_0(m_D)$  becomes superlinear, the establishment time in the sink  
482 is dramatically reduced by the presence of the intermediate sink ( $t_0^I(m_D) \ll t_0(m_D)$ ;  
483 e.g., for  $m_D = 0.5$ ,  $5 \cdot 10^3 \approx t_0(m_D) \gg t_0^I(m_D) \approx 364$ ).

484 **Effect of mutation in the sink on the establishment time.** We have seen in  
485 Fig 6b that mutation has a non-monotonous impact on establishment time. However,  
486 a higher mutation rate affects both the source equilibrium state and the sink dynamics.  
487 A natural question to ask is thus whether local mutation *in the sink* helps or hinders  
488 invasion. Indeed, mutation in the FGM (and other models with both deleterious and  
489 beneficial mutations) can have antagonistic effects: it generates fitness variance to fuel  
490 adaptation but lowers the mean fitness by creating a mutation load. This is of course  
491 also true for mutation in the source, but the interaction with migration in the sink  
492 makes the outcome less straightforward to grasp.

493 To tell apart the influences of local mutation on invasion speed, we analyzed (Ap-  
494 pendix J) a scenario where mutation is absent in the sink, but still active in the source,  
495 so that the latter is unchanged. An expression equivalent to eq. (10) is obtained in this  
496 case for the mean fitness trajectory. We compared the corresponding time to establish-  
497 ment, noted  $t_0^0$ , with the establishment time  $t_0$  to check whether local mutation (in the  
498 sink) speeds or slows invasion.

499 The results in Fig. 7 show that local mutation can either slow down or accelerate  
500 invasion, depending on the mutational variance ( $\mu$ ) and stress level ( $m_D$ ). For a given  
501 level of stress ( $m_D$ ), local mutation tends to speed invasion as long as mutational  
502 variance ( $\mu$ ) is limited (left part of the graph) but hinders it when it becomes larger  
503 (right part of the graph). The transition from helping to hindering invasion happens  
504 at larger  $\mu$  values when the stress is harsher (higher  $m_D$ ). It thus appears that the  
505 beneficial effect of local mutation in producing variance dominates when mutation is  
506 limited while its negative effect in load buildup takes over as  $\mu$  is increased. The  
507 transition occurs at higher  $\mu$  under harsher stress because the former effect is more  
508 critical then, while the latter is roughly independent of stress. This pattern illustrates  
509 quite strikingly the complex implications, for adaptation dynamics, of the ambivalent  
510 nature of mutation in the FGM.

### 511 3.3 Range of validity of the model



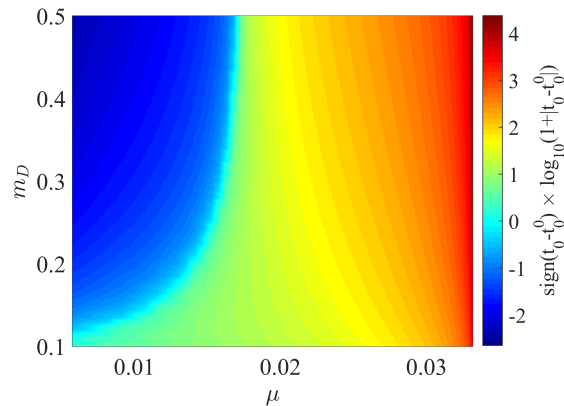

Figure 7: Comparison between the establishment times  $t_0$  (with mutation in the sink) and  $t_0^0$  (without mutation in the sink). The heat map corresponds to  $\text{sign}(t_0 - t_0^0) \log_{10}(1 + |t_0 - t_0^0|)$ : negative values indicate that  $t_0 > t_0^0$  (faster establishment with mutation in the sink) and positive values indicate that  $t_0 < t_0^0$  (faster establishment without mutation in the sink).

512 We explored the range of validity of the analytical model by comparing theory and  
 513 simulations over a wide range of parameter values. The raw results are given in Ap-  
 514 pendix I. Overall, the model is more accurate as  $U$  and  $d$  increase and  $m_D$  (equivalently,  
 515  $r_D = m_D - r_{\max}$ ),  $n$  and  $\lambda$  decrease. More precisely, theoretical and numerical analysis  
 516 yield two (*a priori* conservative) conditions that should lead to the model being accu-  
 517 rate: (i)  $U \geq U_c = n^2\lambda/4$ , for the WSSM to apply; (ii)  $dU/r_D \gg 1$ , for the large  $d$   
 518 approximation to apply.

519 Below we detail each criterion, their robustness and possible empirical insight on their  
 520 realism.

521 **Criterion (i):** it is formally derived in Appendix E of (Martin and Roques, 2016)  
 522 and guarantees that the mutation term associated with the FGM linearizes to produce  
 523 an analytically tractable PDE. While the model is indeed accurate whenever  $U > U_c$ , it  
 524 remains reasonably so even at fairly lower mutation rates. Even for mutation rates  $U =$   
 525  $U_c/30$  (but keeping a large  $d$ ),  $\bar{r}(t)$  and  $N(t)$  from eq. (10) still accurately capture the  
 526 average trajectories (Fig. 8), although the length of Phase 2 in the numerical simulations  
 527 becomes more variable, around this average, as  $U$  is decreased. Consistently, Fig. 6b  
 528 shows that the invasion time in eq. (12) accurately captures the average of simulations  
 529 far below  $U = U_c$ , with larger variability around this mean as  $U$  decreases.

530 As an example, empirical estimates in *E. coli*, based on a recent mutation accumu-  
 531 lation experiment (Trindade et al., 2010) suggest  $U \in [0.004, 0.006]$  and  $\mathbb{E}[s] = n\lambda/2 \in$

532 [0.02, 0.04] (mean effect of mutations on fitness), which yields  $U/U_c \in [0.2, 0.6]$  for  $n = 1$   
533 and  $U/U_c \in [0.033, 0.1]$  for  $n = 6$ . This suggests that *E. coli* may lie somewhere below  
534 the critical mutation rate, at a similar order. Note however that estimates of these  
535 quantities are fairly scarce (even in this well studied biological model) and seem to  
536 vary substantially across experiments (medium, strain, growth conditions). We suspect  
537 that viruses (especially RNA viruses) may lie well within  $U \geq U_c$ , while bacteria may  
538 vary widely around  $U = U_c$ . Obviously any proper statement on this issue would re-  
539 quire a full review of empirical estimates (appropriately scaled in consistent time units),  
540 wherever available.

541 **Criterion (ii):** this criterion, which is confirmed by the simulations in Appendix I  
542 and Fig. 6 panels (a) and (c), stems from the following argument: the early population  
543 size in the sink is of order  $N(t) \approx d/|\bar{r}(0)|$  (no evolution), with  $|\bar{r}(0)| = |r_D + \mu n/2| \approx r_D$   
544 (when  $\mu \ll r_D$ ). Thus whenever  $d \gg r_D/U$ , the mutant input  $N(t)U$  in the sink  
545 population quickly reaches a large value  $N(t)U \approx dU/r_D \gg 1$  and only increases later  
546 on. Adaptive evolution can then take place within the sink, in a way that is accurately  
547 captured by a deterministic approximation (see the dotted lines in Fig. 6). Conversely,  
548 when  $d$  is smaller and/or  $r_D$  is larger, the early population size in the sink is small, so  
549 that the deterministic approximation does not apply anymore. In this case, we see that  
550 the time  $t_0$  is much more variable, and increases on average with smaller  $d$  and larger  
551  $r_D$  (or equivalently  $m_D$ ), see Fig. 6.

552 Empirically evaluating the criterion (ii) requires estimates of  $d, U, r_D$  on the same  
553 timescale (hours, days, generations) in a well defined sink. Such estimates should be  
554 possible from dedicated experiments controlling the immigration rate, in strains with  
555 known mutational parameters, and environmental stresses with well characterized de-  
556 mographic effect. They would greatly help our understanding of source-sink dynamics.  
557 However, to the best of our knowledge, they are not available to date.

## 558 4 Discussion

559 We derived an analytically tractable PDE-ODE framework describing evolutionary and  
560 demographic dynamics of asexuals in a source-sink system. Comparison with individual-  
561 based stochastic simulations shows that the approach is accurate in the WSSM regime  
562 (large mutation rates compared to mutation effects) and with a large migration rate,  
563 and seems robust to mild deviations from this regime. This approach reveals the typical  
564 shape of the trajectories of mean fitness and population sizes in a sink: (1) in the case  
565 of establishment failure, after a brief increase, the mean fitness remains stable at some

566 negative level which depends on the harshness of stress; (2) in the case of successful  
567 establishment, this “plateau” is followed by a sudden increase in mean fitness up to  
568 the point where it becomes positive and the sink becomes a source. Note that here, we  
569 ignored density dependent effects in the sink, so that mean fitness ultimately converges  
570 towards an equilibrium that is independent of any migration effect, the latter being  
571 diluted into an exploding population.

572 The **three first** phases predicted by the model, for the case of successful estab-  
573 lishment, are qualitatively observed in (Dennehy et al., 2010), an experimental study  
574 of invasion of a black-hole sink (an asexual bacteriophage shifting to a new bacterial  
575 host). The “host shift” scenario in their Fig. 3 corresponds roughly to our scenario  
576 with a population evolved on the native host sending migrants to a new host. The  
577 conditions may differ however as the population may not be initially at equilibrium in  
578 the native host at the onset of migration. Yet, the dynamics are **qualitatively simi-**  
579 **lar to those in our Fig. 2, although the time resolution in the data is too limited to**  
580 **claim or test any quantitative agreement.** An extension of the present work could be  
581 to allow for non-equilibrium source populations, which can readily be handled by the  
582 PDE (9) (reformulating  $\phi(z) = \phi(z, t)$ ). However, our analytical result on  $t_0$  does rely  
583 on an equilibrium source population. Note also that the four phases identified here  
584 are observed, in simulations, even in the low  $d$  or low  $U$  regimes where our analytical  
585 derivations can break down quantitatively. Therefore, while the model may provide  
586 qualitatively robust insight, quantitative analyses are necessary to really test its pre-  
587 dictions. This would ideally include associated measures of **decay rates  $r_D$ , mutation**  
588 **rate  $U$  and ideally maximal possible growth rate  $r_{\max}$ , with a known immigration rate**  
589  **$d$ .**

590 Quite unexpectedly, the evolutionary dynamics (especially the waiting time  $t_0$  to  
591 establishment) do not depend on the immigration rate. This emerges mathemati-  
592 cally from the fact that the evolutionary dynamics only depend on the population  
593 size through the ratio  $N(t)/d$  between the current population size and the immigra-  
594 tion rate, this ratio itself remaining independent of  $d$ . This is confirmed by stochastic  
595 individual-based simulations (Fig. 6a): establishment time roughly decreases as  $1/d$   
596 when  $d$  is small but indeed stabilizes as  $d$  becomes larger. More precisely, the result  
597 on the independence of  $t_0$  with respect to  $d$  **should always hold with an initially empty**  
598 **sink and when  $dU/r_D \gg 1$  (see section 3.3).** In this case, the mutant input in the sink  
599 population is always large enough to enable our deterministic framework to accurately  
600 capture the evolution in the sink. **This result *a priori* extends to any model where**  
601 **evolution and demography are density-independent. However density dependent effects**

602 on demography or evolution (including sexual reproduction) might alter this outcome.  
603 Yet, we argue that purely demographic effects due to a finite carrying capacity in the  
604 sink environment should have limited impact on the conclusions of our model, up until  
605 establishment time (as long as  $K$  is large enough).

606 In a black-hole sink experiment Perron et al. (2007) studied the evolution of re-  
607 sistance to two lethal doses of antibiotics and their combinations in the bacterium  
608 *Pseudomonas aeruginosa* (also asexual). Their experiment differs from our scenario in  
609 that the sink populations were initially filled with many “naive” individuals ( $N_0 \gg 1$ ,  
610 amounting to an initial large single immigration event). The authors did notice that  
611 immigration rate  $d$  affected population densities, but this is not directly a test of our  
612 model: our deterministic model also predicts that  $N(t)$  should depend on  $d$ , only the  
613 mean fitness and time to establishment do not.

614 The independence between  $t_0$  and  $d$  is counter-intuitive if we consider sink invasion  
615 as a repeated evolutionary rescue ‘experiment’. Indeed, the immigration process in the  
616 sink could also be seen as a Poisson process of incoming new lineages (from the source),  
617 each having a given probability  $p_R$  to yield a rescue in the future (in the absence of  
618 new immigration), hence to ultimately turn the sink into a source. This probability  
619  $p_R$  can be computed from evolutionary rescue theory, with various flavours: see (Orr  
620 and Unckless, 2014) for a context-independent single allele rescue model or, in the case  
621 of the FGM, using results in (Anciaux et al., 2018). By basic properties of Poisson  
622 processes, the waiting time  $t_1$  to the first arrival, in the sink, of such a future rescue  
623 lineage should be exponential with mean  $1/(d p_R)$ , thus decreasing as  $1/d$ .

624 However, this waiting time is different from the one computed here. Our  $t_0$  denotes  
625 the time at which the mean fitness of the sink population becomes positive in the  
626 absence of immigration, hence the time at which the sink has truly become a source. The  
627 evolutionary rescue approach above computes the time  $t_1$  at which a lineage *ultimately*  
628 destined to produce a resistant genotype, enters the sink. This lineage may be very  
629 rare by  $t = t_1$ , it may even not be resistant itself but only destined to produce a mutant  
630 offspring that will be. The time at which the sink will *de facto* be a positively growing  
631 source can thus be far later. A study and comparison of both waiting times is interesting  
632 and feasible, but beyond the scope of the present paper. This remark, however, has  
633 one key implication: migration may be stopped long before  $t_0$  and the sink may still  
634 ultimately become a source, with some probability (even if this will be ‘visible’ much  
635 later).

636 Some insight into the possible effects of management strategies, e.g. quarantine ( $d$ ),  
637 lethal mutagenesis ( $U$ ), prophylaxis ( $m_D$  and  $r_{\max}$ ), can be developed from the results

638 presented here.

639 Migration (propagule pressure) is considered an important determinant of the suc-  
640 cess of biological invasions in ecology (Von Holle and Simberloff, 2005; Lockwood et al.,  
641 2005). Consistently, it has been shown that the factors increasing potential contacts  
642 between human populations and an established animal pathogen or its host tend to  
643 increase the risk of emergence of infectious diseases (Morse, 2001). Under the 'repeated  
644 rescue approach' above, it is indeed expected that emergence risk should increase as  
645  $1/\text{contact rate}$ . However, the present work shows that the time at which this emergence  
646 will be *de facto* effective (visible) may be unaffected by this contact rate. This means  
647 that care must be taken in the criteria chosen to evaluate strategies, and between the  
648 minimization of emergence risk *vs.* emergence time.

649 The use of a chemical mutagen to avoid the adaptation of a microbial pathogen  
650 and the breakdown of drugs is grounded in lethal mutagenesis theory (Bull et al.,  
651 2007; Bull and Wilke, 2008). Our approach successfully captures the occurrence of  
652 this phenomenon: the establishment fails when the mutation rate  $U$  exceeds a certain  
653 threshold, which depends on  $r_{\max}$ , on the mutational variance  $\lambda$  and on the dimension  
654 of the phenotypic space. Additionally, once this threshold is reached, the equilibrium  
655 mean fitness ceases to depend linearly on the mutational parameter ( $\mu = \sqrt{U\lambda}$ ), but  
656 rapidly decays (see Fig. 5). The existence of this negative "jump" in the equilibrium  
657 mean fitness, whose magnitude depends on the harshness of stress, leaves no room  
658 for evolutionary rescue. Conversely, our approach also reveals that below the lethal  
659 mutagenesis threshold, increasing the mutation rate decreases the establishment time  
660 as  $1/\sqrt{U}$ . Hence, the use of a mutagen may be a double-edged sword since it can both  
661 hamper or increase the potential for adaptation in the sink.

662 As expected, the establishment time  $t_0$  increases with the harshness of stress  $m_D$ ;  
663 the population simply needs more time to adapt to more stressful environmental condi-  
664 tions. Increasing  $m_D$  or decreasing  $r_{\max}$ , whenever possible, are probably the safest ways  
665 to reduce the risks of biological invasions through adaptive processes or cross-species  
666 transmissions of pathogens (in both low and high  $d$  regimes). The precise dependence  
667 of  $t_0$  with respect to  $m_D$  brings us further valuable information. As long as our ap-  
668 proach is valid (not too large stresses, leading to finite establishment times), a linear  
669 dependence emerges. It suggests that, in a more complex environment with a source  
670 and several neighbouring sinks connected by a stepping stone model of migrations, the  
671 exact pathway before establishment occurs in a given sink does not really matter. Only  
672 the sum of the stresses due to habitat shifts has an effect on the overall time needed  
673 to establish in the whole system. Conversely, for larger stress values our analytical

674 approach is not valid, and the numerical simulations indicate a convex (surlinear) de-  
675 pendence of  $t_0$  with respect to  $m_D$ . In such case, for a fixed value of the cumulated  
676 stress, the establishment time in the sink could be drastically reduced by the presence  
677 of intermediate sink habitats.

678 This result, which needs to be confirmed by more realistic modelling approaches  
679 and empirical testing, might have applications in understanding the role of so-called  
680 “preadaptation” in biological invasions. Recent adaptation to one or more facets of  
681 the environment within the native range has been proposed as a factor facilitating  
682 invasions to similar environments (e.g. Hufbauer et al., 2012, anthropogenically induced  
683 adaptation to invade). Our results suggest that preadaptation might only reduces the  
684 overall time to invasion (i.e., taking the preadaptation period into account) only when  
685 invading highly stressful habitats.

686 The effect of a given environmental challenge, and thus their joint effects when  
687 combined (Rex Consortium, 2013), might be modelled in various ways in a fitness  
688 landscape framework (see also discussions in Harmand et al., 2017; Anciaux et al.,  
689 2018). The first natural option is to consider that multiple stresses tend to pull the  
690 optimum further away, and possibly lower the fitness peak  $r_{\max}$ . In the simplified  
691 isotropic model studied here, a larger shift in optimum amounts to increasing  $m_D$ .  
692 However, a possibly more realistic anisotropic version, with some directions favored  
693 by mutation or selection, might lead to directional effects (where two optima at the  
694 same distance are not equally easy to reach) and be particularly relevant to multiple  
695 stress scenarios. Such a more complex model could be handled by focusing on a single  
696 dominant direction (discussed in Anciaux et al., 2018), or by following multiple fitness  
697 components (one per direction, Hamel et al. in prep).

698 Clearly, many developments are possible and could prove useful to understand how  
699 qualitative and quantitative aspects of environmental stresses may affect rescue and  
700 invasion. The present isotropic approach provides a simple, tractable null model for  
701 the latter, where all environmental effects are summarized by their measurable effects  
702 on  $m_D$ ,  $U\lambda$  and  $r_{\max}$ . We hope it will foster the empirical study of source-sinks with  
703 associated measurements of these key parameters.

## 704 Acknowledgments

705 This work was supported by the French Ministry of Higher Education, Research and In-  
706 novation (MESRI allocation doctorale to Y.A.), and the French Agence Nationale de la  
707 Recherche (ANR-13-ADAP-0016 “Silentadapt” to G.M., ANR-13-ADAP-0006 “MeCC”

708 and ANR-14-CE25-0013 “NONLOCAL” to L.R. and ANR-18-CE45-0019 ”RESISTE”  
709 to G.M. and L.R.). This work was fostered by stimulating discussions with Ophélie  
710 Ronce and François Hamel.

## 711 References

- 712 Alexander, H. K., G. Martin, O. Y. Martin, and S. Bonhoeffer (2014). Evolutionary res-  
713 cue: linking theory for conservation and medicine. *Evolutionary applications* 7(10),  
714 1161–1179.
- 715 Anciaux, Y., L.-M. Chevin, O. Ronce, and G. Martin (2018). Evolutionary rescue over  
716 a fitness landscape. *Genetics*, 265–279.
- 717 Barton, N. and A. Etheridge (2017). Establishment in a new habitat by polygenic  
718 adaptation. *Theoretical Population Biology*.
- 719 Blackburn, T. M., P. Pyšek, S. Bacher, J. T. Carlton, R. P. Duncan, V. Jarošík, J. R.  
720 Wilson, and D. M. Richardson (2011). A proposed unified framework for biological  
721 invasions. *Trends in Ecology & Evolution* 26(7), 333–339.
- 722 Bull, J. J., R. Sanjuan, and C. O. Wilke (2007). Theory of lethal mutagenesis for  
723 viruses. *Journal of Virology* 81(6), 2930–2939.
- 724 Bull, J. J. and C. O. Wilke (2008). Lethal mutagenesis of bacteria. *Genetics* 180(2),  
725 1061–1070.
- 726 Burger, R. (1991). Moments, cumulants, and polygenic dynamics. *Journal of Mathe-*  
727 *matical Biology* 30(2), 199–213.
- 728 Colautti, R. I., J. M. Alexander, K. M. Dlugosch, S. R. Keller, and S. E. Sultan  
729 (2017). Invasions and extinctions through the looking glass of evolutionary ecology.  
730 *Philosophical Transactions of the Royal Society B: Biological Sciences* 372(1712),  
731 20160031.
- 732 Débarre, F., O. Ronce, and S. Gandon (2013). Quantifying the effects of migration and  
733 mutation on adaptation and demography in spatially heterogeneous environments.  
734 *Journal of Evolutionary Biology* 26(6), 1185–1202.



- 735 Dennehy, J. J., N. A. Friedenberg, R. C. McBride, R. D. Holt, and P. E. Turner (2010).  
736 Experimental evidence that source genetic variation drives pathogen emergence. *Pro-*  
737 *ceedings of the Royal Society B: Biological Sciences* 277(1697), 3113–3121.
- 738 Drury, K. L. S., J. M. Drake, D. M. Lodge, and G. Dwyer (2007). Immigration events  
739 dispersed in space and time: Factors affecting invasion success. *Ecological Mod-*  
740 *elling* 206, 63–78.
- 741 Furrer, R. D. and G. Pasinelli (2016). Empirical evidence for source–sink populations:  
742 a review on occurrence, assessments and implications. *Biological Reviews* 91(3),  
743 782–795.
- 744 Garnier, J., L. Roques, and F. Hamel (2012). Success rate of a biological invasion in  
745 terms of the spatial distribution of the founding population. *Bulletin of Mathematical*  
746 *Biology* 74, 453–473.
- 747 Gerrish, P. J. and P. D. Sniegowski (2012). Real time forecasting of near-future evolu-  
748 tion. *Journal of the Royal Society Interface* 9(74), 2268–2278.
- 749 Gomulkiewicz, R., R. D. Holt, and M. Barfield (1999). The effects of density depen-  
750 dence and immigration on local adaptation and niche evolution in a black-hole sink  
751 environment. *Theoretical Population Biology* 55(3), 283–296.
- 752 Gomulkiewicz, R., R. D. Holt, M. Barfield, and S. L. Nuismer (2010). Genetics, adap-  
753 tation, and invasion in harsh environments. *Evolutionary Applications* 3(2), 97–108.
- 754 Harmand, N., R. Gallet, R. Jabbour-Zahab, G. Martin, and T. Lenormand (2017).  
755 Fisher’s geometrical model and the mutational patterns of antibiotic resistance across  
756 dose gradients. *Evolution* 71(1), 23–37.
- 757 Hietpas, R. T., C. Bank, J. D. Jensen, and D. N. Bolon (2013). Shifting fitness land-  
758 scapes in response to altered environments. *Evolution* 67(12), 3512–3522.
- 759 Holt, R. D. (2009). Bringing the Hutchinsonian niche into the 21st century: eco-  
760 logical and evolutionary perspectives. *Proceedings of the National Academy of Sci-*  
761 *ences* 106(Supplement 2), 19659–19665.
- 762 Holt, R. D., M. Barfield, and R. Gomulkiewicz (2004). Temporal variation can facilitate  
763 niche evolution in harsh sink environments. *The American Naturalist* 164(2), 187–  
764 200.

- 765 Holt, R. D., M. Barfield, and R. Gomulkiewicz (2005). *Theories of niche conservatism*  
766 *and evolution: could exotic species be potential tests*, pp. 259–290. Sinauer Associates  
767 Sunderland, MA.
- 768 Holt, R. D., R. Gomulkiewicz, and M. Barfield (2003). The phenomenology of niche  
769 evolution via quantitative traits in a “black-hole” sink. *Proceedings of the Royal*  
770 *Society of London B: Biological Sciences* 270(1511), 215–224.
- 771 Hufbauer, R. A., R. Facon, V. Ravigné, J. Turgeon, J. Foucaud, C. E. Lee, O. Rey, and  
772 A. Estoup (2012). Anthropogenically induced adaptation to invade (AIAI): contem-  
773 porary adaptation to human-altered habitats within the native range can promote  
774 invasions. *Evolutionary Applications* 5(1), 89–101.
- 775 Jansen, M., A. Coors, R. Stoks, and L. De Meester (2011). Evolutionary ecotoxicology  
776 of pesticide resistance: a case study in *Daphnia*. *Ecotoxicology* 20(3), 543–551.
- 777 Kimura, M. (1965). A stochastic model concerning the maintenance of genetic variabil-  
778 ity in quantitative characters. *Proceedings of the National Academy of Sciences* 54(3),  
779 731–736.
- 780 Kirkpatrick, M. and N. H. Barton (1997). Evolution of a species’range. *The American*  
781 *Naturalist* 150, 1–23.
- 782 Lande, R. (1980). The genetic covariance between characters maintained by pleiotropic  
783 mutations. *Genetics* 94(1), 203–215.
- 784 Lenormand, T. (2002). Gene flow and the limits to natural selection. *Trends in Ecology*  
785 *& Evolution* 17(4), 183–189.
- 786 Lockwood, J. L., P. Cassey, and T. Blackburn (2005). The role of propagule pressure  
787 in explaining species invasions. *Trends in Ecology & Evolution* 20(5), 223–228.
- 788 Loreau, M., A. Daufresne, Tand Gonzalez, D. Gravel, F. Guichard, S. J. Leroux,  
789 N. Loeuille, F. Massol, and N. Mouquet (2013). Unifying sources and sinks in ecology  
790 and earth sciences. *Biological Reviews* 88(2), 365–379.
- 791 MacLean, R. C., A. R. Hall, G. G. Perron, and A. Buckling (2010). The population  
792 genetics of antibiotic resistance: integrating molecular mechanisms and treatment  
793 contexts. *Nature Reviews Genetics* 11(6), 405.

- 794 Martin, G. (2014). Fisher’s geometrical model emerges as a property of complex inte-  
795 grated phenotypic networks. *Genetics* 197(1), 237–255.
- 796 Martin, G., S. F. Elena, and T. Lenormand (2007). Distributions of epistasis in microbes  
797 fit predictions from a fitness landscape model. *Nature Genetics* 39(4), 555.
- 798 Martin, G. and T. Lenormand (2015). The fitness effect of mutations across environ-  
799 nments: Fisher’s geometrical model with multiple optima. *Evolution* 69(6), 1433–1447.
- 800 Martin, G. and L. Roques (2016). The non-stationary dynamics of fitness distributions:  
801 Asexual model with epistasis and standing variation. *Genetics* 204(4), 1541–1558.
- 802 Morse, S. S. (2001). Factors in the emergence of infectious diseases. In *Plagues and*  
803 *politics*, pp. 8–26. Springer.
- 804 Orr, H. A. and R. L. Unckless (2014). The population genetics of evolutionary rescue.  
805 *PLoS Genetics* 10(8), e1004551.
- 806 Perron, G. G., A. Gonzalez, and A. Buckling (2007). Source-sink dynamics shape the  
807 evolution of antibiotic resistance and its pleiotropic fitness cost. *Proceedings of the*  
808 *Royal Society of London B: Biological Sciences* 274(1623), 2351–2356.
- 809 Pulliam, H. R. (1988). Sources, sinks, and population regulation. *The American Nat-*  
810 *uralist* 132(5), 652–661.
- 811 Rex Consortium (2013). Heterogeneity of selection and the evolution of resistance.  
812 *Trends in Ecology & Evolution* 28(2), 110–118.
- 813 Sokurenko, E. V., R. Gomulkiewicz, and D. E. Dykhuizen (2006). Source-sink dynamics  
814 of virulence evolution. *Nature Reviews Microbiology* 4(7), 548.
- 815 Tenaillon, O. (2014). The utility of Fisher’s geometric model in evolutionary genetics.  
816 *Annual Review of Ecology, Evolution, and Systematics* 45, 179–201.
- 817 Trindade, S., L. Perfeito, and I. Gordo (2010). Rate and effects of spontaneous muta-  
818 tions that affect fitness in mutator *Escherichia coli*. *Philosophical Transactions of the*  
819 *Royal Society B: Biological Sciences* 365(1544), 1177–1186.
- 820 Trindade, S., A. Sousa, and I. Gordo (2012). Antibiotic resistance and stress in the light  
821 of Fisher’s model. *Evolution: International Journal of Organic Evolution* 66(12),  
822 3815–3824.

823 Von Holle, B. and D. Simberloff (2005). Ecological resistance to biological invasion  
824 overwhelmed by propagule pressure. *Ecology* 86(12), 3212–3218.

## 825 **A Fitness distribution of the migrants: derivation** 826 **of formulae (5) and (6)**

Consider an individual with phenotype  $\mathbf{x}$ . Its fitness in the source is  $m_{source} = -\|\mathbf{x} - \mathbf{x}^*\|^2/2$ , where  $\mathbf{x}^*$  is the optimal phenotype in the source, whereas its fitness in the sink is  $m_{migr} = -\|\mathbf{x}\|^2/2$ . We observe that

$$\begin{aligned} m_{migr} &= -\frac{\|\mathbf{x} - \mathbf{x}^* + \mathbf{x}^*\|^2}{2} \\ &= -\frac{\|\mathbf{x} - \mathbf{x}^*\|^2 + \|\mathbf{x}^*\|^2 + 2(\mathbf{x} - \mathbf{x}^*) \cdot \mathbf{x}^*}{2} \\ &= m_{source} - \frac{\|\mathbf{x}^*\|^2}{2} - \|\mathbf{x} - \mathbf{x}^*\| \|\mathbf{x}^*\| u \\ &= m_{source} - m_D - 2\sqrt{m_D |m_{source}|} u, \end{aligned} \quad (13)$$

with  $m_D = \|\mathbf{x}^*\|^2/2$  and a constant  $u \in [-1, 1]$ . As the source is assumed to be at the mutation-selection equilibrium, the distribution of fitness in the source satisfies  $m_{source} \sim -\Gamma(n/2, \mu)$  (Martin and Roques, 2016, equation (10)) and the corresponding moment generating function is  $M_{m_{source}}(z) = (1 + \mu z)^{-n/2}$ . The results in (Martin and Lenormand, 2015) show that  $u$  is a random variable with moment generating function:

$$M_u(z) := \mathbb{E}[e^{uz}] = {}_0F_1(n/2, z^2/4),$$

with  ${}_0F_1$  the hypergeometric function, defined by  ${}_0F_1(\theta, z) = \sum_{k=0}^{\infty} \frac{1}{\theta(\theta+1)\dots(\theta+k-1)} \frac{z^k}{k!}$ . Let us first compute the moment generating function  $M_{migr}(z) := \mathbb{E}[e^{m_{migr}z}]$ . We have

$$M_{migr}(z) = \mathbb{E}[\mathbb{E}[e^{m_{migr}z} | m_{source}]],$$

and using (13),

$$\begin{aligned} M_{migr}(z) &= \mathbb{E} \left[ e^{m_{source}z} M_u \left( -2\sqrt{m_D |m_{source}|} z \right) \right] e^{-m_D z} \\ &= \mathbb{E} \left[ e^{m_{source}z} {}_0F_1 \left( n/2, -m_D m_{source} z^2 \right) \right] e^{-m_D z}. \end{aligned}$$

Thanks to the definition of the hypergeometric function  ${}_0F_1(n/2, z)$ , we get:

$$\begin{aligned} M_{migr}(z) &= \sum_{k=0}^{\infty} \frac{(-m_D)^k}{n/2(n/2+1)\dots(n/2+k-1)} \frac{z^{2k}}{k!} \mathbb{E}[e^{m_{source}z} m_{source}^k] e^{-m_D z} \\ &= \sum_{k=0}^{\infty} \frac{(-m_D)^k}{n/2(n/2+1)\dots(n/2+k-1)} \frac{z^{2k}}{k!} M_{m_{source}}^{(k)}(z) e^{-m_D z}, \end{aligned}$$

with  $M_{m_{source}}^{(k)}(z)$  the  $k^{\text{th}}$  derivative of  $M_{m_{source}}(z)$  with respect to  $z$ . Thus,

$$\begin{aligned} M_{migr}(z) &= \sum_{k=0}^{\infty} \frac{1}{k!} \left( \frac{m_D \mu z^2}{1 + \mu z} \right)^k (1 + \mu z)^{-n/2} e^{-m_D z} \\ &= \frac{1}{(1 + \mu z)^{n/2}} \cdot \exp \left[ -m_D z + \frac{m_D \mu z^2}{1 + \mu z} \right]. \end{aligned}$$

827 Setting  $\phi(z) = \ln(M_{migr}(z))$ , we obtain formula (5).

Let us now show that the distribution of the migrants in the sink satisfies (6). Let  $p_{migr}$  be defined by (6). We just have to check that the moment generating function of  $p_{migr}$  is  $M_{migr}$ :

$$\begin{aligned} \int_{-\infty}^0 e^{zx} p_{migr}(x) dx &= \int_{-\infty}^0 e^{zx} \frac{1}{\mu} \left( \frac{|x|}{m_D} \right)^{\frac{n/2-1}{2}} e^{\frac{x-m_D}{\mu}} I_{\frac{n}{2}-1} \left[ \frac{2\sqrt{m_D|x|}}{\mu} \right] dx \\ &= e^{-m_D/\mu} \int_{-\infty}^0 \sum_{p=0}^{\infty} e^{(z+1/\mu)x} \frac{m_D^p}{\mu^{2p+n/2}} \cdot \frac{1}{p!} \cdot \frac{|x|^{p+n/2-1}}{\Gamma(p+n/2)} dx \\ &= e^{-m_D/\mu} \sum_{p=0}^{\infty} \frac{m_D^p}{\mu^{2p+n/2}} \cdot \frac{1}{p!} \cdot \frac{1}{\Gamma(p+n/2)} \int_{-\infty}^0 e^{(z+1/\mu)x} |x|^{p+n/2-1} dx, \end{aligned}$$

828 where  $I_\nu$  is the modified Bessel function of the first kind and  $\Gamma$  the gamma function.

829 Now, for all positive numbers  $a$  and  $b$ , we have:

$$\int_{-\infty}^0 e^{ax} |x|^{b-1} dx = \frac{1}{a^b} \int_0^{\infty} e^{-x} |x|^{b-1} dx = \frac{\Gamma(b)}{a^b}.$$

Therefore, we get, for  $z > -1/\mu$ :

$$\begin{aligned} \int_{-\infty}^0 e^{zx} p_{migr}(x) dx &= e^{-m_D/\mu} \sum_{p=0}^{\infty} \frac{m_D^p}{\mu^{2p+n/2}} \cdot \frac{1}{p!} \cdot \frac{1}{\Gamma(p+n/2)} \frac{\Gamma(p+n/2)}{(z+1/\mu)^{p+n/2}} \\ &= \frac{e^{-m_D/\mu}}{(1 + \mu z)^{n/2}} \sum_{p=0}^{\infty} \left( \frac{m_D/\mu}{1 + \mu z} \right)^p \cdot \frac{1}{p!} \\ &= \frac{e^{-m_D/\mu}}{(1 + \mu z)^{n/2}} \exp \left( \frac{m_D/\mu}{1 + \mu z} \right) \\ &= \frac{1}{(1 + \mu z)^{n/2}} \exp \left( -\frac{m_D z}{1 + \mu z} \right). \end{aligned}$$

830 This is consistent with formula (5), which proves that the expression (6) is correct.

## 831 B PDE satisfied by the CGF of the fitness distri- 832 bution

In the WSSM regime, and in the absence of immigration, Martin and Roques (2016) (see Appendix E, equation (E5)) have shown that the CGF of the fitness distribution satisfies the following equation:

$$\partial_t C_t(z) = \partial_z C_t(z) - \partial_z C_t(0) - \mu^2 \left( z^2 \partial_z C_t(z) + \frac{n}{2} z \right), \quad z \geq 0.$$

833 We derive here the additional term in (9), which describes the effect of immigration on  
834 the CGF.

In that respect, we consider a discrete population of size  $N(t) \in \mathbb{N}$  at time  $t$ , and the corresponding fitnesses  $(m_1(t), \dots, m_{N(t)}(t))$ . We define the “empirical” moment generating function

$$M_t(z) := \frac{1}{N(t)} \sum_{i=1}^{N(t)} e^{m_i(t) z}.$$

Assuming a Poisson number of immigration events, with rate  $d$  per unit time (see Section 2.5), for  $\Delta t$  small enough, the probability that a single immigration events occurs during  $(t, t+\Delta t)$  is approximately  $d \Delta t$ . The probability that several immigration events occur during this time interval is close to 0. Therefore, the expected change in the moment generating function during  $\Delta t$ , conditionally on the fitness  $m_{migr}$  of the unique migrant, is:

$$\begin{aligned} \Delta M_t(z|m_{migr}) &= d \Delta t \left[ \frac{1}{N(t)+1} \left( \sum_{i=1}^{N(t)} e^{m_i(t) z} + e^{m_{migr} z} \right) - \frac{1}{N(t)} \sum_{i=1}^{N(t)} e^{m_i(t) z} \right] \\ &= d \Delta t \left[ \frac{e^{m_{migr} z}}{N(t)+1} - \frac{M_t(z)}{N(t)+1} \right]. \end{aligned}$$

Taking expectation over the distribution of  $m_{migr}$  (see Appendix A for more details on the distribution of  $m_{migr}$ ), we get

$$\Delta M_t(z) = \frac{d \Delta t}{N(t)+1} (e^{\phi(z)} - M_t(z)),$$

835 with  $\phi(z) = \ln(\mathbb{E}[e^{m_{migr} z}])$ . The corresponding change in the CGF  $C_t(z) = \ln M_t(z)$   
836 is  $\Delta C_t(z) \approx \Delta M_t(z)/M_t(z)$ . Thus,

$$\Delta C_t(z) \approx \frac{d \Delta t}{N(t)} (e^{\phi(z)-C_t(z)} - 1).$$



837 Finally, dividing the above expression by  $\Delta t$  and passing to the limit  $\Delta t \rightarrow 0$ , we obtain  
838 the last term in (9), which describes the effect of immigration on the CGF:

$$\frac{d}{N(t)} (e^{\phi(z)-C_t(z)} - 1). \quad (14)$$

## 839 C Solution of the system (1) & (9)

840 This section is devoted to the mathematical study of the system (1) & (9). We rewrite  
841 it in the following form:

$$\begin{cases} \partial_t C_t(z) = \alpha(z) \partial_z C_t(z) - \bar{m}(t) + \beta(z) + \frac{d}{N(t)} (e^{\phi(z) - C_t(z)} - 1), \\ N'(t) = N(t) (r_{\max} + \bar{m}(t)) + d, \\ C_t(0) = 0, \\ N(0) = 0, \end{cases} \quad (15)$$

842 with  $t > 0$  and  $z \geq 0$ , and where  $\bar{m}(t) = \partial_z C_t(0)$ ,  $d \geq 0$ ,  $\alpha(z) := 1 - \mu^2 z^2$ ,  $\beta(z) :=$   
843  $-\mu n z/2$ .

844 We can easily check that the sink is not empty at each time  $t > 0$ :

845 **Lemma 1.** *Assume that  $\bar{m}$  is continuous over  $[0, \infty)$ . Then, at all time  $t > 0$ , we have*  
846  $N(t) > 0$ .

847 *Proof.* For  $\varepsilon > 0$  small enough, as  $N'(0) = d > 0$ , we have  $N(t) > 0$  for all  $t \in (0, \varepsilon]$ .  
848 Additionally, for all  $t \geq \varepsilon$ ,

$$N(t) = e^{\int_{\varepsilon}^t (r_{\max} + \bar{m}(s)) ds} \left( N(\varepsilon) + d \int_{\varepsilon}^t e^{-\int_{\varepsilon}^v (r_{\max} + \bar{m}(s)) ds} dv \right) > 0. \quad (16)$$

849 □

850 Let  $N(t)$ ,  $C_t(z)$  be a solution of (15), such that  $\bar{m}$  is continuous over  $[0, \infty)$ . Set  
851  $D_t(z) = C_t(y(z))$ , with  $y(z) = \tanh(\mu z)/\mu$  which satisfies:

$$\begin{cases} y'(z) = \alpha(y(z)), \\ y(0) = 0, \end{cases}$$

852 so that

$$\partial_t D_t(z) = \partial_t C_t(y(z)) \quad \text{and} \quad \partial_z D_t(z) = \alpha(y(z)) \partial_z C_t(y(z)).$$

853 Thus,  $D_t(z)$  satisfies the simpler equation

$$\partial_t D_t(z) = \partial_z D_t(z) - \bar{m}(t) + \beta(y(z)) + \frac{d}{N(t)} (e^{\phi(y(z)) - D_t(z)} - 1),$$

854 with  $\bar{m}(t) = \partial_z D_t(0)$ .

855 Using the method of characteristics, we derive an analytic expression for  $D_t(z)$ . Fix  
856  $z \geq 0$  and denote for all  $z \geq t > 0$ :

$$v(t) = \exp(D_t(z - t)).$$

The function  $v \in C^1((0, z])$  satisfies for all  $t \in (0, z)$ :

$$\begin{aligned} v'(t) &= (\partial_t D_t(z-t) - \partial_z D_t(z-t)) v(t), \\ &= \left[ \beta(y(z-t)) - \bar{m}(t) - \frac{d}{N(t)} \right] v(t) + \frac{d}{N(t)} e^{\phi(y(z-t))}, \\ &= \left[ \beta(y(z-t)) - \frac{N'(t)}{N(t)} + r_{\max} \right] v(t) + \frac{d}{N(t)} e^{\phi(y(z-t))}, \end{aligned}$$

thanks to  $N'(t) = (r_{\max} + \bar{m}(t))N(t) + d$ . Let us fix times  $0 < \varepsilon < t$ . By Lemma 1, we know that  $N(s) > 0$ , for all  $s \in [\varepsilon, t]$  and so  $v(t)$  is given by:

$$\begin{aligned} v(t) &= \exp \left[ \int_{\varepsilon}^t \left( \beta(y(z-\tau)) - \frac{N'(\tau)}{N(\tau)} + r_{\max} \right) d\tau \right] \\ &\quad \left[ e^{C(\varepsilon, y(z))} + \int_{\varepsilon}^t \frac{d e^{\phi(y(z-\tau))}}{N(\tau)} \exp \left( - \int_{\varepsilon}^{\tau} \left( \beta(y(z-s)) - \frac{N'(s)}{N(s)} + r_{\max} \right) ds \right) d\tau \right]. \end{aligned}$$

As  $\int_{\varepsilon}^t \frac{N'(s)}{N(s)} ds = \ln N(t) - \ln N(\varepsilon)$ , we can simplify the last expression to:

$$\begin{aligned} v(t) &= \exp \left[ -\ln N(t) + \int_{\varepsilon}^t (\beta(y(z-\tau)) + r_{\max}) d\tau \right] \\ &\quad \left[ N(\varepsilon) \ln e^{C(\varepsilon, y(z))} + \int_{\varepsilon}^t d e^{\phi(y(z-\tau))} \exp \left( - \int_{\varepsilon}^{\tau} (\beta(y(z-s)) + r_{\max}) ds \right) d\tau \right]. \end{aligned}$$

Taking the limit as  $\varepsilon$  tends to 0 and using the fact that the initial population in the sink is  $N(0) = 0$ , the above expression can be simplified to:

$$v(t) = d \int_0^t e^{\phi(y(z-\tau)) - \int_0^{\tau} (\beta(y(z-s)) + r_{\max}) ds} d\tau \cdot \exp \left[ -\ln N(t) + \int_0^t (\beta(y(z-\tau)) + r_{\max}) d\tau \right].$$

Hence, by reversing the characteristics, we get:

$$\begin{aligned} D_t(z) &= \int_0^t \beta(y(z+\tau)) d\tau - \ln(N(t)) + r_{\max} t \\ &\quad + \ln \left[ d \int_0^t e^{\phi(y(z+\tau)) - r_{\max}(t-\tau) - \int_{\tau}^t \beta(y(z+s)) ds} d\tau \right]. \end{aligned}$$

857 This leads to an explicit but complex formula for  $C_t(z)$  thanks to the relation

$$C_t(z) = D_t \left( \frac{1}{\mu} \operatorname{atanh}(\mu z) \right). \quad (17)$$

Additionally, we have:

$$\partial_z D_t(z) = \beta(y(z+t)) - \beta(y(z)) + \frac{\int_0^t \partial_z g(t, z, \tau) d\tau}{\int_0^t g(t, z, \tau) d\tau},$$

with  $g(t, z, \tau) = \exp \left[ \phi(y(z + \tau)) + r_{\max}(\tau - t) - \int_{\tau}^t \beta(y(z + s)) ds \right]$ . Using the fact that  $\bar{m}(t) = \partial_z D_t(0)$ ,  $y(0) = 0$  and  $\beta(0) = 0$ , we get:

$$\begin{aligned} \bar{m}(t) &= \beta(y(t)) + \frac{\int_0^t g(t, 0, \tau) [y'(\tau)\phi'(y(\tau)) + \beta(y(\tau)) - \beta(y(t))] d\tau}{\int_0^t g(t, 0, \tau) d\tau}, \\ &= \frac{\int_0^t g(t, 0, \tau) [y'(\tau)\phi'(y(\tau)) + \beta(y(\tau))] d\tau}{\int_0^t g(t, 0, \tau) d\tau}, \\ &= \frac{\int_0^t g(t, 0, \tau) [y'(\tau)\phi'(y(\tau)) + \beta(y(\tau)) + r_{\max}] d\tau}{\int_0^t g(t, 0, \tau) d\tau} - r_{\max}, \\ &= \frac{\int_0^t g(t, 0, \tau) \partial_{\tau} g(t, 0, \tau) d\tau}{\int_0^t g(t, 0, \tau) d\tau} - r_{\max}, \\ &= \frac{g(t, 0, t) - g(t, 0, 0)}{\int_0^t g(t, 0, \tau) d\tau} - r_{\max}. \end{aligned}$$

858 Using the expression  $g(t, 0, \tau) = \exp \left[ \phi(y(\tau)) + r_{\max}(\tau - t) - \int_{\tau}^t \beta(y(s)) ds \right]$ , the for-  
859 mula (5) for  $\phi$  and  $y(z) = \tanh(\mu z)/\mu$ , we finally get:

$$\bar{m}(t) = \frac{\exp \left[ (r_{\max} - \mu \frac{n}{2})t + \frac{m_D}{2\mu} (e^{-2\mu t} - 1) \right] - 1}{\int_0^t \exp \left[ (r_{\max} - \frac{n}{2}\mu)\tau + \frac{m_D}{2\mu} (e^{-2\mu\tau} - 1) \right] d\tau} - r_{\max}. \quad (18)$$

860 As we have an explicit formula for  $\bar{m}(t)$ , we can also solve the ODE  $N'(t) = N(t) (r_{\max} +$   
861  $\bar{m}(t)) + d$  (formula (16), with  $\varepsilon = 0$  and  $N(\varepsilon) = 0$ ). Finally, we can check that  
862  $N(t)$ ,  $C_t(z)$  (defined by (17)) is a solution of (15) such that  $\bar{m}$  (given by (18)) is  
863 continuous over  $[0, \infty)$ . Using the expression (18) with  $\bar{r}(t) = r_{\max} + \bar{m}(t)$ , we obtain  
864 the formula (10) in the main text.

## 865 D Trajectories of mean fitness: $U < U_c$

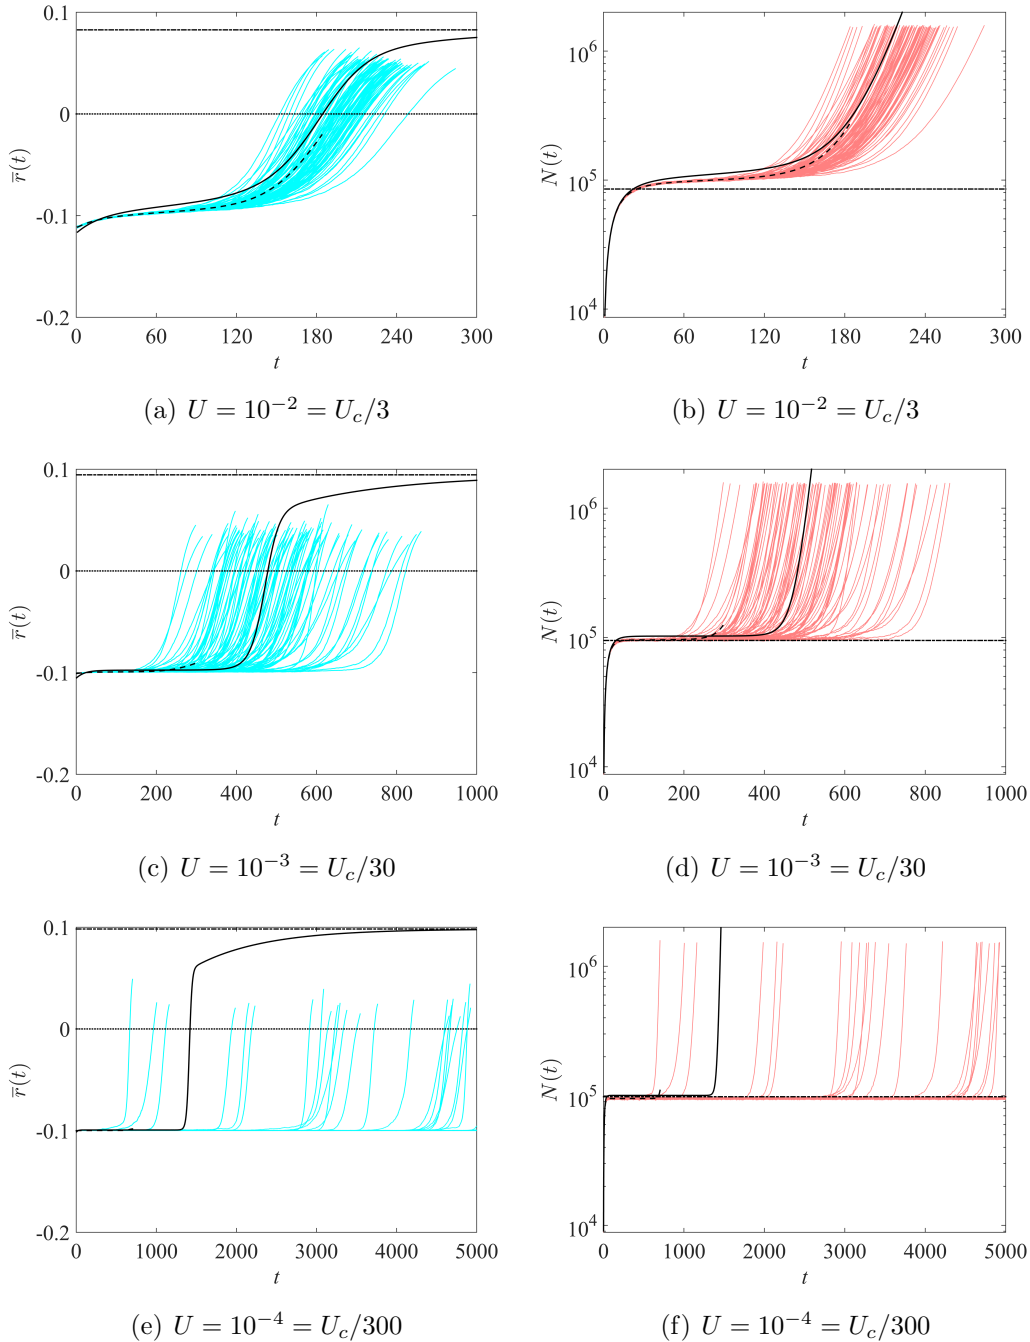

Figure 8: **Trajectories of mean fitnesses and population sizes, low mutation rates.** Same legend as in Fig. 2. Other parameter values are  $m_D = 0.2$ ,  $r_{\max} = 0.1$ ,  $\lambda = 1/300$ ,  $n = 6$  and  $d = 10^4$ , leading to  $U_c = 0.03$ .

866 **E Phenotype distribution in the sink: dynamics of**  
867  $\bar{r}(t)$  and  $N(t)$

868 The dynamics of mean fitness and population size corresponding to Fig. 3 are plotted  
869 in Fig. 9, to illustrate the occurrence of the four phases in this particular simulation.

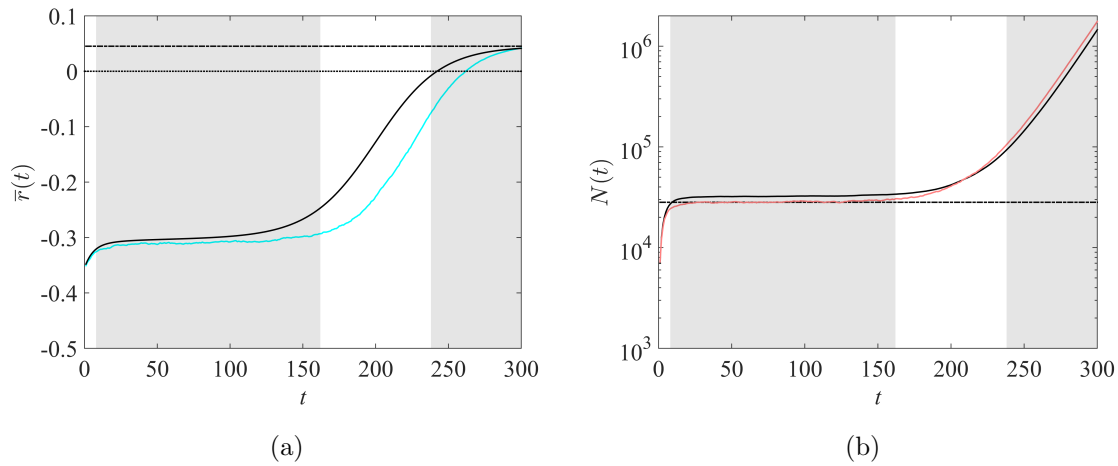

Figure 9: **Trajectory of mean fitness and population size in the sink corresponding to the phenotype distribution in Fig. 3. Same legend as in Fig. 2.**

## 870 **F Independence of the evolutionary dynamics with** 871 **respect to the immigration rate**

The value of  $\bar{r}(t)$  in formula (10) does not depend on  $d$ . Thus, only the population size dynamics are influenced by the immigration rate, but not the dynamics of adaptation. Actually, this phenomenon appears for a more general deterministic black-hole sink model, with a stable source and a constant immigration rate  $d \geq 0$ . In the sink, we have just to assume that the environment is initially empty ( $N(0) = 0$ ), that both demography and evolution are density-independent (so that density dependence only arises in the migration effect). Apart from that, the proposed generalization may accommodate arbitrary forms of mutation and selection effects (possibly with changes in stress over time). The model then takes the following general form:

$$\left\{ \begin{array}{l} \partial_t C_t(z) = \text{Selection}(t, z, C_t(z)) + \text{Mutation}(t, z, C_t(z)) + \frac{d}{N(t)} (e^{\phi(z) - C_t(z)} - 1), \\ N'(t) = N(t) \bar{r}(t) + d, \\ C_t(0) = 0, \\ N(0) = 0, \end{array} \right.$$

with  $\bar{r}(t) = \partial_z C_t(0)$  the coefficient of the exponential growth. Setting  $P(t) = N(t)/d$ , we observe that the above system can be written in the form:

$$\left\{ \begin{array}{l} \partial_t C_t(z) = \text{Adaptation}(t, z, C_t(z)) + \text{Mutation}(t, z, C_t(z)) + \frac{1}{P(t)} (e^{\phi(z) - C_t(z)} - 1), \\ P'(t) = P(t) \bar{r}(t) + 1, \\ C_t(0) = 0, \\ P(0) = 0, \end{array} \right.$$

872 with  $\bar{r}(t) = \partial_z C_t(0)$ . As this system does not depend on  $d$ , this implies that the  
873 dynamics of  $P(t)$ , of mean fitness  $\bar{r}(t)$ , and even of the full fitness distribution ( $C_t(z)$ )  
874 are all independent of  $d$ .



## 875 **G Large time behavior of $\bar{r}(t)$**

We recall that, according to formula (10),

$$\bar{r}(t) = \frac{f(t) - 1}{\int_0^t f(\tau) d\tau},$$

876 with  $f(t) = \exp \left[ \left( r_{\max} - \mu \frac{n}{2} \right) t + \frac{m_D}{2\mu} (e^{-2\mu t} - 1) \right]$ .

877

878 *We first show that  $\bar{r}(t)$  is an increasing function of  $t$ .* First, we can check that

$$f'(t) = f(t) \left( r_{\max} - \frac{\mu n}{2} - m_D e^{-2\mu t} \right).$$

Second, we have

$$\begin{aligned} \bar{r}'(t) &= \frac{f'(t)}{\int_0^t f(\tau) d\tau} - \frac{f(t) - 1}{\left( \int_0^t f(\tau) d\tau \right)^2} f(t) \\ &= \frac{f(t)}{\left( \int_0^t f(\tau) d\tau \right)^2} \left[ \left( r_{\max} - \frac{\mu n}{2} - m_D e^{-2\mu t} \right) \int_0^t f(\tau) d\tau - (f(t) - 1) \right]. \end{aligned}$$

879 Let  $h(t) = \left( r_{\max} - \frac{\mu n}{2} - m_D e^{-2\mu t} \right) \int_0^t f(\tau) d\tau - (f(t) - 1)$ . Thus we see that

$$h'(t) = 2\mu m_D e^{-2\mu t} \int_0^t f(\tau) d\tau \geq 0.$$

880 Therefore for all  $t > 0$ ,  $h(t) > h(0) = 0$ , which shows that  $\bar{r}$  is increasing.

881 Since  $\bar{r}(0) = r_{\max} - \mu n/2 - m_D$ , this implies that  $\bar{r}(t) > r_{\max} - \mu n/2 - m_D$  for all  
882  $t > 0$ . In particular,  $\bar{r}(\infty) \geq r_{\max} - \mu n/2 - m_D$  which implies that  $\delta(m_D) < m_D$  in  
883 (11).

884

885 *Next, we compute the limit of  $\bar{r}(t)$  as  $t \rightarrow \infty$ .*

Case (i): we assume that  $r_{\max} - \mu n/2 > 0$ . Then,  $f(t) \sim e^{-\frac{m_D}{2\mu}} e^{(r_{\max} - \mu n/2)t}$  and

$$\int_0^t f(\tau) d\tau \sim e^{-\frac{m_D}{2\mu}} \frac{e^{(r_{\max} - \mu n/2)t}}{r_{\max} - \mu n/2}, \text{ as } t \rightarrow \infty.$$

Thus,

$$\bar{r}(t) \rightarrow r_{\max} - \mu n/2 \text{ as } t \rightarrow \infty.$$

886

887 Case (ii): we assume that  $r_{\max} - \mu n/2 = 0$ . Then  $f(t) = \exp\left[\frac{m_D}{2\mu}(e^{-2\mu t} - 1)\right]$  and  
 888  $\int_0^t f(\tau) d\tau \sim t e^{-m_D/(2\mu)}$  as  $t \rightarrow \infty$ . Thus,

$$\bar{r}(t) \sim \frac{e^{-m_D/(2\mu)} - 1}{e^{-m_D/(2\mu)}t} \rightarrow 0 \text{ as } t \rightarrow \infty.$$

889

Case (iii): we assume that  $r_{\max} - \mu n/2 < 0$ . Consider an arbitrary constant  $\alpha \in (0, 2)$ . We can check that, for all  $t < T_\alpha := \frac{1}{2\mu} \ln \frac{2}{\alpha}$ , we have:

$$e^{-2\mu t} < 1 - \alpha\mu t.$$

In the sequel, we denote  $X := r_{\max} - \mu n/2$ . We get:

$$\begin{aligned} \int_0^\infty f(t)dt &= \int_0^{T_\alpha} f(t)dt + \int_{T_\alpha}^\infty f(t)dt \\ &\leq \int_0^{T_\alpha} \exp((X - m_D\alpha/2)t) dt \\ &\quad + \int_{T_\alpha}^\infty \exp\left[Xt + \frac{m_D}{2\mu}(e^{-2\mu T_\alpha} - 1)\right] dt. \end{aligned}$$

Using the assumption  $X = r_{\max} - \mu n/2 < 0$ , we obtain:

$$\int_0^\infty f(t)dt \leq \frac{e^{(X - m_D\alpha/2)T_\alpha} - 1}{X - m_D\alpha/2} - \exp\left[\frac{m_D}{2\mu}(e^{-2\mu T_\alpha} - 1)\right] \frac{e^{XT_\alpha}}{X},$$

and using the definition of  $T_\alpha = \frac{1}{2\mu} \ln \frac{2}{\alpha}$ , we obtain

$$\int_0^\infty f(t)dt \leq -\left(\frac{\alpha}{2}\right)^{\frac{-X}{2\mu}} \left[\frac{\gamma}{X - \alpha m_D/2} + \frac{\rho}{X}\right],$$

with  $\gamma := \left(\frac{\alpha}{2}\right)^{\frac{X}{2\mu}} - \left(\frac{\alpha}{2}\right)^{\alpha m_D/(4\mu)}$  and  $\rho = \exp\left[\frac{m_D}{2\mu}\left(\frac{\alpha}{2} - 1\right)\right]$ . This leads to the following inequality:

$$\bar{r}(\infty) = -\frac{1}{\int_0^\infty f(t)dt} \leq \left(\frac{\alpha}{2}\right)^{\frac{X}{2\mu}} \frac{X - \alpha m_D/2}{\gamma + \rho \left(1 - \frac{\alpha m_D}{2X}\right)},$$

which can be rewritten:

$$\bar{r}(\infty) \leq \frac{X - \alpha m_D/2}{1 + \varepsilon},$$

with

$$\varepsilon := \left(1 - \frac{\alpha m_D}{2X}\right) \rho \left(\frac{\alpha}{2}\right)^{-\frac{X}{2\mu}} - \left(\frac{\alpha}{2}\right)^{\frac{\alpha m_D}{4\mu} - \frac{X}{2\mu}}.$$

Next, to show that  $\bar{r}(\infty) < X - \alpha m_D/2$ , we only need to check that  $\varepsilon < 0$ . This is true for certain values of  $\alpha$ . As  $\rho = \exp\left[\frac{m_D}{2\mu}\left(\frac{\alpha}{2} - 1\right)\right]$ , we observe that  $\varepsilon$  has the same sign as:

$$\varepsilon' = \left(1 - \frac{\alpha m_D}{2X}\right) \exp\left[\frac{m_D}{4\mu}(\alpha - 2)\right] - \exp\left[\frac{m_D}{4\mu}\alpha \ln(\alpha/2)\right].$$

Since  $X = r_{\max} - \mu n/2$ , we get:

$$\varepsilon' = \frac{m_D}{4\mu} [-\alpha \ln(\alpha/2) + \alpha(1 + 4/n) - 2] + o\left(\frac{1}{\mu}\right),$$

890 as  $\mu \rightarrow \infty$ . Thus,  $\varepsilon < 0$  for  $\mu$  large enough, if and only if:

$$n > \frac{4}{\ln(\alpha/2) - 1 + 2/\alpha}. \quad (19)$$

891 For  $\alpha$  small enough, this inequality is true for any  $n \geq 1$ . However, higher values of  $\alpha$   
 892 lead to sharper estimates of  $\delta(m_D)$  in (11). With  $\alpha = 1/4$  for instance, the inequality  
 893 (19) is always satisfied (as  $n \geq 1$ ). We obtain that  $\bar{r}(\infty) \leq X - \frac{m_D}{8}$  and  $\delta(m_D) \geq \frac{m_D}{8}$   
 894 for  $\mu$  large enough. If  $\alpha$  is increased, e.g.,  $\alpha = 1/2$ , the inequality (19) is true for all  
 895  $n \geq 3$ , and consequently,  $\bar{r}(\infty) \leq X - \frac{m_D}{4}$  for  $\mu$  large enough ( $\delta(m_D) \geq \frac{m_D}{4}$ , for  $\mu$  large  
 896 enough). In our numerical computations ( $n = 6$ ), we can use  $\alpha = 3/4$ , which leads to  
 897  $\bar{r}(\infty) \leq X - \frac{3m_D}{8}$  and  $\delta(m_D) \geq \frac{3m_D}{8}$  for large  $\mu$ .

## 898 H Establishment time $t_0$ : formula (12)

899 We recall that  $t_0$  is defined as the first zero of  $\bar{r}(t)$ . We note that, since  $\bar{r}(t)$  is increasing,  
900 it admits at most one zero.

901 First, if  $r_{\max} - \mu n/2 \leq 0$ , as  $\bar{r}(t)$  is increasing and  $\bar{r}(\infty) < r_{\max} - \mu n/2$  (see (11)  
902 and Appendix G), we have  $\bar{r}(t) < 0$  for all  $t \geq 0$ . This implies that  $t_0 = \infty$ .

903 Second we assume that  $r_{\max} - \mu n/2 > 0$ . In this case,  $\bar{r}(\infty) = r_{\max} - \mu n/2 > 0$   
904 and the time  $t_0$  is finite (and positive). Therefore, we can solve the equation  $\bar{r}(t) = 0$ ,  
905 which is equivalent to:

$$(r_{\max} - \mu n/2)t + \frac{m_D}{2\mu} (e^{-2\mu t} - 1) = 0. \quad (20)$$

906 Let us set  $c := m_D/(r_{\max} - \mu n/2)$ . Since  $\bar{r}(0) = r_{\max} - \mu n/2 - m_D < 0$ , we observe  
907 that  $c > 1$ . The equation (20) is equivalent to:

$$2\mu t - c = -ce^{-2\mu t}.$$

908 Multiplying this expression by  $e^{2\mu t - c}$ , we get:

$$(2\mu t - c)e^{2\mu t - c} = -ce^{-c}.$$

909 Setting  $X := 2\mu t - c$ , we obtain:

$$X e^X = -ce^{-c}. \quad (21)$$

910 As  $c > 1$ ,  $-ce^{-c} \in (-e^{-1}, 0)$ , thus the equation (21) admits two solutions,  $X_0 =$   
911  $W_0(-ce^{-c})$  and  $X_{-1} = W_{-1}(-ce^{-c}) < X_0$ , with  $W_0$  and  $W_{-1}$  respectively the principal  
912 branch and the lower branch of the Lambert-W function. Thus, the equation (20)  
913 admits two solutions,  $(c + X_0)/(2\mu)$  and  $(c + X_{-1})/(2\mu) = 0$ , but only the first one is  
914 positive. Finally, we obtain that

$$t_0 = \frac{1}{2\mu} (c + W_0(-ce^{-c})). \quad (22)$$

As  $t_0$  is an increasing function of  $c$ , we obtain that  $t_0$  decreases as  $r_{\max}$  is increased,  
and  $t_0$  increases as  $m_D$  and  $n$  are increased. The dependence with respect to  $\mu$  is more  
subtle. Differentiating the expression (22) with respect to  $\mu$ , we observe that  $t'_0(\mu)$  has  
the same sign as:

$$\left( \frac{\mu n}{2r_{\max} - \mu n} - 1 - W_0(-ce^{-c}) \right) (c + W_0(-ce^{-c})).$$

As the second factor in the above expression is always positive (since  $c > 1$ ), we get that  $t'_0(\mu)$  has the same sign as the function:

$$g(\mu) := \frac{\mu n}{2r_{\max} - \mu n} - 1 - W_0(-ce^{-c}).$$

915 Differentiating  $g$  with respect to  $\mu$ , we observe that  $g'(\mu)$  has the same sign as  $r_{\max} +$   
916  $(\mu n/2 + m_D) W_0(-ce^{-c}) = r_{\max} - \mu n/2 + \mu n(1 - W_0(-ce^{-c}))/2 + m_D W_0(-ce^{-c})$ .  
917 Thus  $g'(\mu)$  has the same sign as  $m_D(1/c + W_0(-ce^{-c})) + \mu n(1 - W_0(-ce^{-c}))/2 > 0$ ,  
918 as  $1/c + W_0(-ce^{-c}) > 0$  (since  $c > 1$ ) and  $1 - W_0(-ce^{-c}) > 0$ . Finally,  $g$  is increasing,  
919 with:

$$g(0) = -1 - W_0\left(-\frac{m_D}{r_{\max}}e^{-\frac{m_D}{r_{\max}}}\right) \leq 0,$$

920 (and the sign is strict unless  $m_D = r_{\max}$ ). Additionally, we have  $g(2r_{\max}/n) = +\infty$   
921 (corresponding to  $\mu_{lethal}$ ). This means that, unless  $m_D = r_{\max}$ ,  $t_0(\mu)$  first decreases  
922 until  $\mu$  reaches an optimal value, and then increases as  $\mu$  is increased.

## 923 I Establishment time $t_0$ : dependence with the harsh- 924 ness of stress $m_D$ and the immigration rate $d$

925 Using the stochastic individual-based model of Section 2.5, we analysed the dependence  
926 of the establishment time  $t_0$  with respect to  $m_D$  and  $d$  for a wide range of parameter  
927 values. Namely, taking  $U = 0.1$ ,  $r_{\max} = 0.1$ ,  $\lambda = 1/300$  and  $n = 6$  as in Fig. 6,  $m_D$   
928 was varied between 0.1 and 0.5. The results are presented in Fig. 10a. It shows that,  
929 for each value of  $m_D$ , there is a threshold value of the immigration rate above which  
930 the establishment time  $t_0$  becomes almost independent of  $d$ . This threshold tends to  
931 increase as the harshness of stress  $m_D$  takes higher values. Additionally, we measured  
932 the relative error between the theoretical value of  $t_0$  given by formula (12) and the value  
933 given by individual-based simulations; see Fig. 10b. As soon as the parameters are far  
934 from the black region in Fig. 10, (a,b), the approximation is accurate (relative error  
935  $< 0.1$ ). This black region corresponds to values of  $t_0 > 5000$ , for which individual-based  
936 simulations were stopped before establishment, and where we can expect that the final  
937 outcome is establishment failure. This means that there is only a narrow region where  
938 formula (12) is not accurate; it is located close to the region where establishment fails,  
939 and describes a rapid increase in  $t_0$  which is not captured by our analytical approach.

940 Fig. 10 (c,d) depicts comparable simulations, with  $U = U_c/3 = 0.01$ , i.e., outside of  
941 the WSSM regime. The conclusions are similar to the case  $U = 0.1$ , but with a larger  
942 region corresponding to establishment failure, and a lower accuracy (panel d).

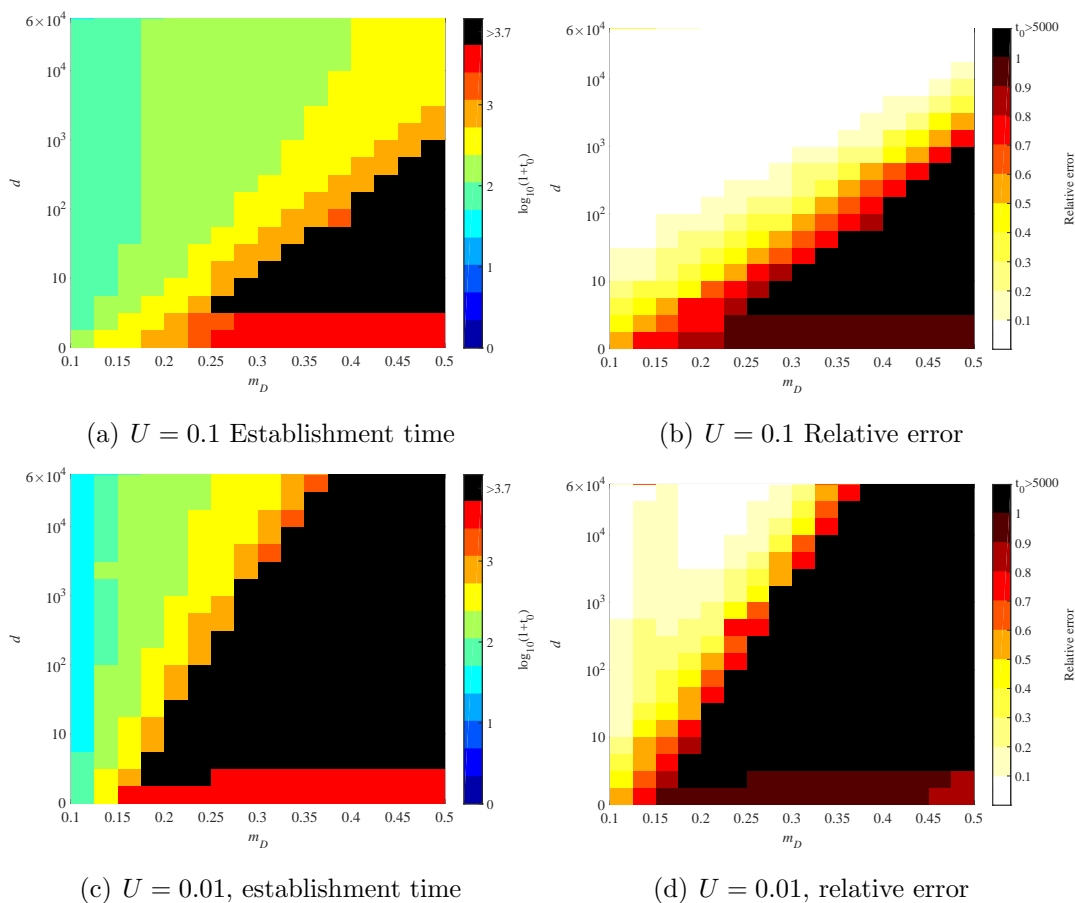

Figure 10: **Establishment time  $t_0$ , dependence with the harshness of stress  $m_D$  and the immigration rate  $d$ .** (a,c): Average value of  $t_0$  over 100 individual-based simulations. The color legend corresponds to  $\log_{10}(1+t_0)$ . (b,d): relative error between the theoretical value of  $t_0$  given by formula (12) and the average value obtained by individual-based simulations. The black regions correspond to parameter values for which at least one simulation led to  $t_0 > 5000$ ; in that case, the average value of  $t_0$  was not computed numerically. In all cases, the parameter values are  $r_{\max} = 0.1$ ,  $\lambda = 1/300$ ,  $n = 6$ .

## 943 J Dynamics in the absence of mutation in the sink

944 To get a better understanding of the four phases described in Section 3.1, we considered  
945 the case where the mutation rate  $U = 0$  in the sink (while it remains positive in the  
946 source).

First, using the same arguments as in Appendix C, we can derive a formula for  $\bar{r}(t)$   
in that case. The formula can be expressed in the same form as (10), with:

$$f(t) = \exp[\phi(t) + r_{\max} t],$$

947 with  $\phi$  given by (5).

948 An example of trajectory of fitness is given in Fig. 11, where we observe that the  
949 four phases are still present. The corresponding phenotype distribution is presented in  
950 Fig. 12. A video file of the phenotype distribution is also available as Supplementary  
951 File 3.

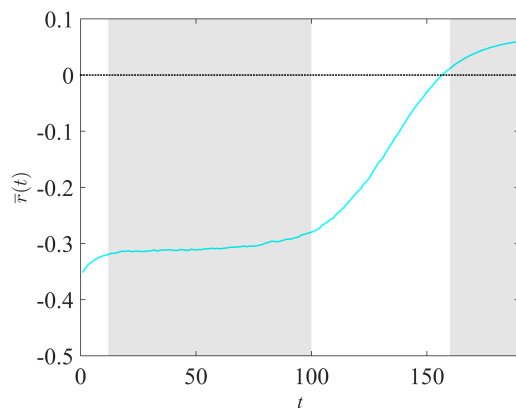

Figure 11: **Dynamics of  $\bar{r}(t)$  in the absence of mutation in the sink.** The blue curve corresponds to the trajectory of  $\bar{r}(t)$  given by a single individual-based simulation, in the absence of mutation in the sink. The parameter values are  $m_D = 0.4$ ,  $U = 0.1$ ,  $r_{\max} = 0.1$ ,  $\lambda = 1/300$ ,  $n = 6$  and  $d = 10^4$ .



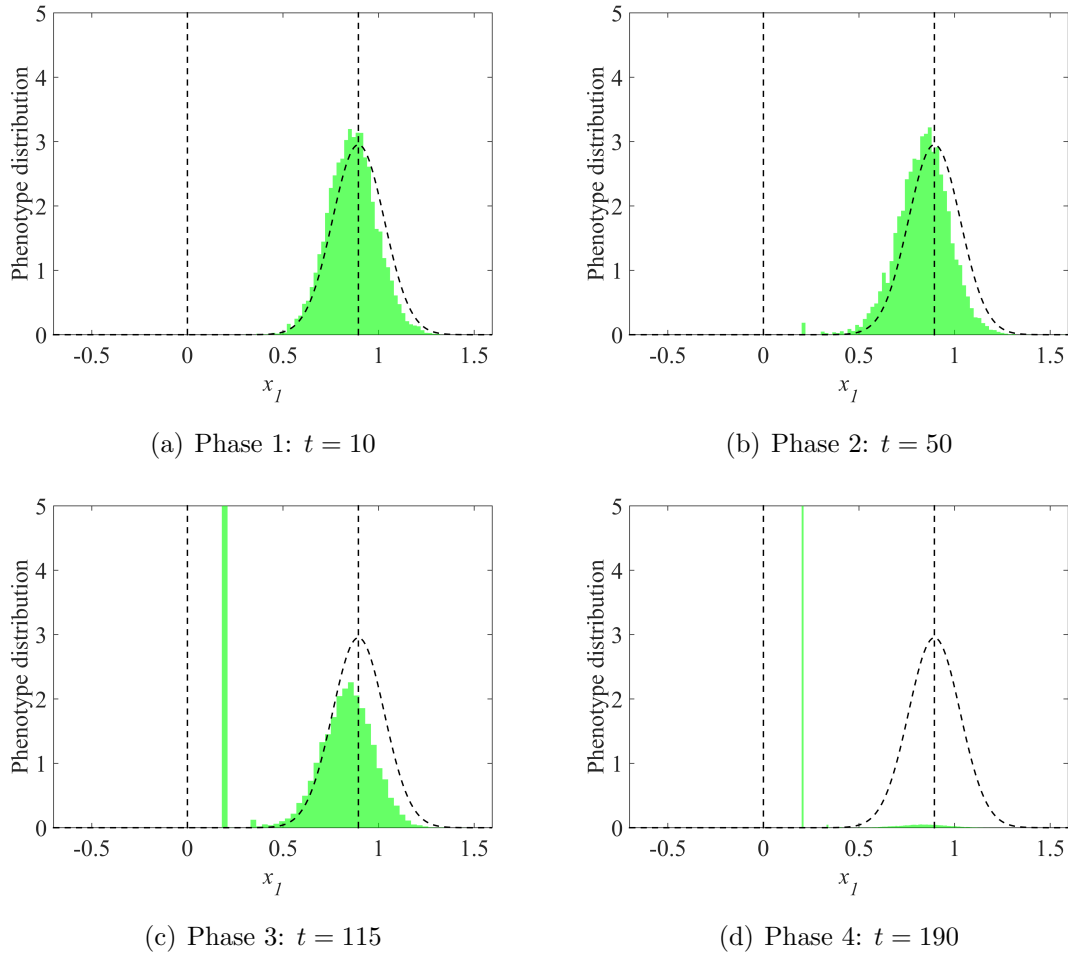

Figure 12: **Phenotype distribution in the sink, along the direction  $x_1$ , in the absence of mutation.** The vertical dotted lines correspond to the sink ( $x_1 = 0$ ) and source ( $x_1 = \sqrt{2m_D}$ ) optima. The black dotted curve corresponds to the theoretical distribution of migrant's phenotypes in the sink (Gaussian distribution, centered at  $x_1 = \sqrt{2m_D}$ , and with variance  $\mu = \sqrt{U\lambda}$ ). The parameter values are  $m_D = 0.4$ ,  $U = 0.1$ ,  $r_{\max} = 0.1$ ,  $\lambda = 1/300$ ,  $n = 6$  and  $d = 10^4$ .
